# Supplementary material
Source: ML conference proceedings conference paper supplement (https://proceedings.mlr.press/v54/kull17a.html)
Supplement: Supplementary file 1 [file kull17a-supp.pdf]

---

# Beta calibration: a well-founded and easily implemented improvement on logistic calibration for binary classifiers – Supplementary material

---

**Meelis Kull**  
University of Bristol  
University of Tartu

**Telmo de Menezes e Silva Filho**  
Universidade Federal de Pernambuco  
Centro de Informática

**Peter Flach**  
University of Bristol

This material supplements the AISTATS 2017 paper on beta calibration and presents tables and critical difference diagrams for all results obtained in the experimental analysis. In all the tables, best results are marked in **bold** and subscript numbers indicate the ranks. Due to space limitations, numbers are rounded to three decimal digits, therefore, differences that occur after the third digit are not shown.

We evaluated the effect of applying beta calibration and its variations to the scores produced by Naive Bayes and Adaboost on 41 datasets from UCI, see Table 1 with the detailed information. Multiclass datasets were transformed into binary by calling the biggest class positive and all the other classes negative. We compared the performance of beta calibration, beta[a=b] calibration, beta[m=1/2] calibration, isotonic calibration, logistic calibration and uncalibrated probabilities, in terms of Brier score (BS) and log-loss (LL) and accuracy.

The results were obtained from 10 times 5-fold cross-validation, totalling 50 executions. Within each execution we used 3-fold internal cross-validation with 2 folds for learning the model and 1 for fitting the calibration map. Thus, three calibrated classifiers were generated during each execution, the outputs of these three were averaged to provide predictions on the test fold. The same methodology was used in the paper proposing the logistic calibration (Platt, 2000). All experiments were written in Python and the code is publicly available<sup>1</sup>.

For Naive Bayes (NB), we used the implementation provided by Scikit-learn (Pedregosa et al., 2011). For boosting we used 200 decision stumps as weak learners and implemented two different versions of the standard Adaboost algorithm. The first is the original Adaboost with probabilities extracted in the standard way as in (Friedman et al., 2000), we refer to it as Ada-O. The second is the one implemented in Scikit-learn's based on Adaboost method SAMME (Zhu et al., 2009), we refer to it as Ada-S.

We first compared the full 3-parameter beta calibration with logistic and isotonic calibration methods, as well as

with the uncalibrated probabilities, across all 3x3 settings (NB, Ada-O, Ada-S; LL, BS, Accuracy). The results for NB, Ada-O and Ada-S are respectively provided in Tables 2-4, 8-10, 14-16, and the respective critical difference diagrams in Figures 1-3, 7-9, 13-15. We then continued to compare the variants of beta calibration, leaving the non-parametric isotonic out of the picture. The results are provided in Tables 5-7, 11-13, 17-19, and the respective critical difference diagrams in Figures 4-6, 10-12, 16-18.

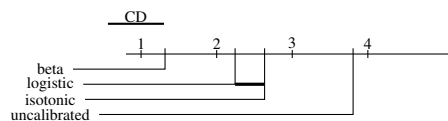

Figure 1: Critical difference diagram for log-loss results with Naive Bayes as base classifier. Friedman test shows significance at p-value= $6.879e-17$ .

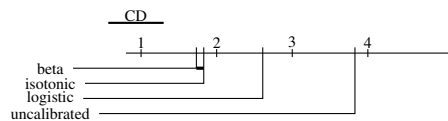

Figure 2: Critical difference diagram for Brier score results with Naive Bayes as base classifier. Friedman test shows significance at p-value= $1.002e-14$ .

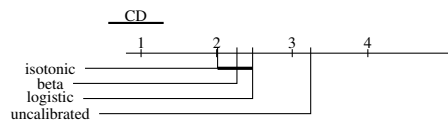

Figure 3: Critical difference diagram for accuracy results with Naive Bayes as base classifier. Friedman test shows significance at p-value= $3.201e-05$ .

<sup>1</sup><https://betacal.github.io>

Table 1: Description of the 41 classification datasets from UCI used for the experiments.

| Name                 | Samples | Features | Classes |
|----------------------|---------|----------|---------|
| abalone              | 4177    | 8        | 3       |
| autos                | 159     | 25       | 6       |
| balance-scale        | 625     | 4        | 3       |
| car                  | 1728    | 6        | 4       |
| cleveland            | 297     | 13       | 5       |
| credit-approval      | 653     | 15       | 2       |
| dermatology          | 358     | 34       | 6       |
| diabetes             | 768     | 8        | 2       |
| ecoli                | 336     | 7        | 8       |
| flare                | 1389    | 10       | 6       |
| german               | 1000    | 20       | 2       |
| glass                | 214     | 9        | 6       |
| heart-statlog        | 270     | 13       | 2       |
| hepatitis            | 155     | 19       | 2       |
| horse                | 300     | 27       | 2       |
| ionosphere           | 351     | 34       | 2       |
| iris                 | 150     | 4        | 3       |
| landsat-satellite    | 6435    | 36       | 6       |
| letter               | 35000   | 16       | 26      |
| libras-movement      | 360     | 90       | 15      |
| lung-cancer          | 96      | 7129     | 2       |
| mfeat-karhunen       | 2000    | 64       | 10      |
| mfeat-morphological  | 2000    | 6        | 10      |
| mfeat-zernike        | 2000    | 47       | 10      |
| mushroom             | 8124    | 22       | 2       |
| optdigits            | 5620    | 64       | 10      |
| page-blocks          | 5473    | 10       | 5       |
| pendigits            | 10992   | 16       | 10      |
| scene-classification | 2407    | 294      | 2       |
| segment              | 2310    | 19       | 7       |
| shuttle              | 101500  | 9        | 7       |
| sonar                | 208     | 60       | 2       |
| spambase             | 4601    | 57       | 2       |
| tic-tac              | 958     | 9        | 2       |
| vehicle              | 846     | 18       | 4       |
| vowel                | 990     | 10       | 11      |
| waveform-5000        | 5000    | 40       | 3       |
| wdbc                 | 569     | 30       | 2       |
| wdbc                 | 194     | 33       | 2       |
| yeast                | 1484    | 8        | 10      |
| zoo                  | 101     | 16       | 7       |

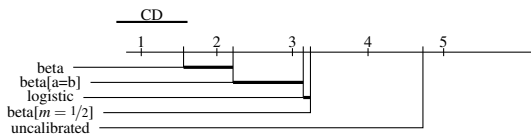

Figure 4: Critical difference diagram for log-loss results of parametric methods with Naive Bayes as base classifier. Friedman test shows significance at  $p$ -value= $1.202e-20$ .

Table 2: Log-loss results for Naive Bayes (standard deviation in parentheses). Best results are marked in **bold** and subscript numbers indicate the ranks. Differences between results may occur after the third decimal digit. Results significant at  $6.879e-17$ , according to Friedman’s test.

| dataset | uncalibrated                         | beta                                 | isotonic                             | logistic                             |
|---------|--------------------------------------|--------------------------------------|--------------------------------------|--------------------------------------|
| abalone | 1.170 <sub>4</sub><br>(0.077)        | <b>0.621</b> <sub>1</sub><br>(0.008) | 0.626 <sub>3</sub><br>(0.017)        | 0.623 <sub>2</sub><br>(0.008)        |
| autos   | 0.810 <sub>4</sub><br>(0.305)        | <b>0.529</b> <sub>1</sub><br>(0.043) | 0.548 <sub>2</sub><br>(0.172)        | 0.558 <sub>3</sub><br>(0.037)        |
| balance | 0.284 <sub>4</sub><br>(0.013)        | <b>0.117</b> <sub>1</sub><br>(0.033) | 0.157 <sub>3</sub><br>(0.121)        | 0.118 <sub>2</sub><br>(0.032)        |
| car     | 0.396 <sub>3</sub><br>(0.015)        | 0.382 <sub>2</sub><br>(0.022)        | <b>0.382</b> <sub>1</sub><br>(0.044) | 0.396 <sub>4</sub><br>(0.026)        |
| clevela | 0.631 <sub>4</sub><br>(0.220)        | <b>0.415</b> <sub>1</sub><br>(0.074) | 0.605 <sub>3</sub><br>(0.385)        | 0.424 <sub>2</sub><br>(0.076)        |
| credit- | 1.043 <sub>4</sub><br>(0.332)        | <b>0.390</b> <sub>1</sub><br>(0.051) | 0.539 <sub>3</sub><br>(0.237)        | 0.448 <sub>2</sub><br>(0.055)        |
| dermato | 0.282 <sub>4</sub><br>(0.340)        | <b>0.060</b> <sub>1</sub><br>(0.047) | 0.081 <sub>3</sub><br>(0.118)        | 0.062 <sub>2</sub><br>(0.047)        |
| diabete | 0.612 <sub>4</sub><br>(0.116)        | <b>0.502</b> <sub>1</sub><br>(0.032) | 0.570 <sub>3</sub><br>(0.163)        | 0.516 <sub>2</sub><br>(0.034)        |
| ecoli   | 1.376 <sub>4</sub><br>(0.324)        | <b>0.126</b> <sub>1</sub><br>(0.075) | 0.364 <sub>3</sub><br>(0.471)        | 0.272 <sub>2</sub><br>(0.064)        |
| flare   | 2.047 <sub>4</sub><br>(0.831)        | <b>0.421</b> <sub>1</sub><br>(0.023) | 0.425 <sub>2</sub><br>(0.025)        | 0.548 <sub>3</sub><br>(0.016)        |
| german  | 0.786 <sub>4</sub><br>(0.198)        | 0.536 <sub>2</sub><br>(0.026)        | 0.550 <sub>3</sub><br>(0.083)        | <b>0.523</b> <sub>1</sub><br>(0.025) |
| glass   | 1.179 <sub>4</sub><br>(0.774)        | 0.599 <sub>2</sub><br>(0.053)        | 0.769 <sub>3</sub><br>(0.461)        | <b>0.598</b> <sub>1</sub><br>(0.044) |
| heart-s | 0.568 <sub>4</sub><br>(0.205)        | <b>0.397</b> <sub>1</sub><br>(0.079) | 0.508 <sub>3</sub><br>(0.440)        | 0.407 <sub>2</sub><br>(0.080)        |
| hepatit | 2.746 <sub>4</sub><br>(1.776)        | <b>0.365</b> <sub>1</sub><br>(0.103) | 0.467 <sub>3</sub><br>(0.442)        | 0.405 <sub>2</sub><br>(0.072)        |
| horse   | 2.503 <sub>4</sub><br>(1.469)        | <b>0.482</b> <sub>1</sub><br>(0.052) | 0.733 <sub>3</sub><br>(0.408)        | 0.593 <sub>2</sub><br>(0.043)        |
| ionosph | 1.077 <sub>4</sub><br>(0.393)        | <b>0.293</b> <sub>1</sub><br>(0.061) | 0.425 <sub>3</sub><br>(0.370)        | 0.319 <sub>2</sub><br>(0.068)        |
| iris    | <b>0.000</b><br>(0.002)              | 0.000 <sub>3</sub><br>(0.002)        | 0.008 <sub>4</sub><br>(0.014)        | 0.000 <sub>2</sub><br>(0.002)        |
| landsat | 0.630 <sub>4</sub><br>(0.094)        | <b>0.180</b> <sub>1</sub><br>(0.016) | 0.191 <sub>2</sub><br>(0.027)        | 0.221 <sub>3</sub><br>(0.017)        |
| letter  | 0.087 <sub>4</sub><br>(0.006)        | 0.081 <sub>2</sub><br>(0.003)        | <b>0.077</b> <sub>1</sub><br>(0.004) | 0.085 <sub>3</sub><br>(0.003)        |
| libras- | 0.377 <sub>4</sub><br>(0.379)        | <b>0.124</b> <sub>1</sub><br>(0.065) | 0.253 <sub>3</sub><br>(0.286)        | 0.132 <sub>2</sub><br>(0.054)        |
| lung-ca | 0.752 <sub>4</sub><br>(0.991)        | <b>0.164</b> <sub>1</sub><br>(0.067) | 0.171 <sub>3</sub><br>(0.070)        | 0.169 <sub>2</sub><br>(0.068)        |
| mfeat-k | 0.123 <sub>4</sub><br>(0.080)        | <b>0.055</b> <sub>1</sub><br>(0.019) | 0.092 <sub>3</sub><br>(0.083)        | 0.064 <sub>2</sub><br>(0.021)        |
| mfeat-m | 0.055 <sub>4</sub><br>(0.072)        | 0.013 <sub>2</sub><br>(0.017)        | 0.018 <sub>3</sub><br>(0.041)        | <b>0.013</b> <sub>1</sub><br>(0.017) |
| mfeat-z | 1.189 <sub>4</sub><br>(0.180)        | <b>0.092</b> <sub>1</sub><br>(0.022) | 0.107 <sub>2</sub><br>(0.059)        | 0.138 <sub>3</sub><br>(0.016)        |
| mushroo | 0.611 <sub>4</sub><br>(0.087)        | 0.258 <sub>2</sub><br>(0.015)        | <b>0.228</b> <sub>1</sub><br>(0.019) | 0.269 <sub>3</sub><br>(0.019)        |
| optdigi | 11.967 <sub>4</sub><br>(1.024)       | <b>0.240</b> <sub>1</sub><br>(0.010) | 0.344 <sub>3</sub><br>(0.114)        | 0.270 <sub>2</sub><br>(0.006)        |
| page-bl | 0.992 <sub>4</sub><br>(0.147)        | 0.210 <sub>2</sub><br>(0.012)        | <b>0.194</b> <sub>1</sub><br>(0.024) | 0.261 <sub>3</sub><br>(0.011)        |
| pendigi | 0.328 <sub>4</sub><br>(0.037)        | <b>0.076</b> <sub>1</sub><br>(0.006) | 0.093 <sub>3</sub><br>(0.016)        | 0.086 <sub>2</sub><br>(0.006)        |
| scene-c | 11.566 <sub>4</sub><br>(0.720)       | <b>0.452</b> <sub>1</sub><br>(0.015) | 0.582 <sub>3</sub><br>(0.096)        | 0.463 <sub>2</sub><br>(0.013)        |
| segment | 1.256 <sub>4</sub><br>(0.132)        | <b>0.110</b> <sub>1</sub><br>(0.022) | 0.138 <sub>2</sub><br>(0.083)        | 0.196 <sub>3</sub><br>(0.021)        |
| shuttle | 0.675 <sub>4</sub><br>(0.025)        | 0.276 <sub>2</sub><br>(0.003)        | <b>0.206</b> <sub>1</sub><br>(0.002) | 0.322 <sub>3</sub><br>(0.003)        |
| sonar   | 1.987 <sub>4</sub><br>(0.941)        | <b>0.538</b> <sub>1</sub><br>(0.068) | 0.643 <sub>3</sub><br>(0.397)        | 0.592 <sub>2</sub><br>(0.062)        |
| spambas | 4.959 <sub>4</sub><br>(0.462)        | <b>0.359</b> <sub>1</sub><br>(0.024) | 0.701 <sub>3</sub><br>(0.136)        | 0.403 <sub>2</sub><br>(0.015)        |
| tic-tac | 0.589 <sub>3</sub><br>(0.016)        | <b>0.579</b> <sub>1</sub><br>(0.022) | 0.589 <sub>4</sub><br>(0.085)        | 0.582 <sub>2</sub><br>(0.022)        |
| vehicle | 0.426 <sub>4</sub><br>(0.113)        | <b>0.386</b> <sub>1</sub><br>(0.040) | 0.389 <sub>2</sub><br>(0.078)        | 0.402 <sub>3</sub><br>(0.046)        |
| vowel   | <b>0.112</b> <sub>1</sub><br>(0.024) | 0.112 <sub>2</sub><br>(0.023)        | 0.161 <sub>4</sub><br>(0.130)        | 0.126 <sub>3</sub><br>(0.030)        |
| wavefor | 0.359 <sub>4</sub><br>(0.030)        | <b>0.291</b> <sub>1</sub><br>(0.016) | 0.307 <sub>3</sub><br>(0.032)        | 0.306 <sub>2</sub><br>(0.017)        |
| wdbc    | 0.511 <sub>4</sub><br>(0.238)        | <b>0.146</b> <sub>1</sub><br>(0.040) | 0.203 <sub>2</sub><br>(0.150)        | 0.223 <sub>3</sub><br>(0.051)        |
| wdbc    | 1.373 <sub>4</sub><br>(0.593)        | 0.539 <sub>2</sub><br>(0.047)        | 0.740 <sub>3</sub><br>(0.576)        | <b>0.537</b> <sub>1</sub><br>(0.028) |
| yeast   | 1.922 <sub>4</sub><br>(1.945)        | <b>0.550</b> <sub>1</sub><br>(0.018) | 0.557 <sub>2</sub><br>(0.048)        | 0.567 <sub>3</sub><br>(0.028)        |
| zoo     | 0.585 <sub>4</sub><br>(1.050)        | 0.136 <sub>2</sub><br>(0.198)        | 0.314 <sub>3</sub><br>(0.628)        | <b>0.136</b> <sub>1</sub><br>(0.198) |
| rank    | 3.80                                 | 1.32                                 | 2.63                                 | 2.24                                 |

Table 3: Brier score results for Naive Bayes (standard deviation in parentheses). Best results are marked in **bold** and subscript numbers indicate the ranks. Differences between results may occur after the third decimal digit. Results significant at  $1.002e-14$ , according to Friedman’s test.

| dataset   | uncalibrated                                  | beta                                          | isotonic                                      | logistic                                      |
|-----------|-----------------------------------------------|-----------------------------------------------|-----------------------------------------------|-----------------------------------------------|
| abalone   | 0.302 <sub>4</sub><br>(0.012)                 | 0.216 <sub>2</sub><br>(0.003)                 | <b>0.216</b> <sub>1</sub><br>( <b>0.004</b> ) | 0.217 <sub>3</sub><br>(0.004)                 |
| autos     | 0.221 <sub>4</sub><br>(0.054)                 | 0.178 <sub>2</sub><br>(0.018)                 | <b>0.178</b> <sub>1</sub><br>( <b>0.023</b> ) | 0.189 <sub>3</sub><br>(0.016)                 |
| balance   | 0.077 <sub>4</sub><br>(0.006)                 | 0.034 <sub>2</sub><br>(0.011)                 | <b>0.034</b> <sub>1</sub><br>( <b>0.011</b> ) | 0.034 <sub>3</sub><br>(0.011)                 |
| car       | 0.134 <sub>4</sub><br>(0.006)                 | 0.132 <sub>2</sub><br>(0.009)                 | <b>0.129</b> <sub>1</sub><br>( <b>0.009</b> ) | 0.134 <sub>3</sub><br>(0.011)                 |
| cleveland | 0.138 <sub>4</sub><br>(0.038)                 | <b>0.129</b> <sub>1</sub><br>( <b>0.027</b> ) | 0.130 <sub>3</sub><br>(0.028)                 | 0.129 <sub>2</sub><br>(0.030)                 |
| credit-   | 0.162 <sub>4</sub><br>(0.030)                 | <b>0.117</b> <sub>1</sub><br>( <b>0.018</b> ) | 0.117 <sub>2</sub><br>(0.019)                 | 0.140 <sub>3</sub><br>(0.021)                 |
| dermato   | 0.011 <sub>3</sub><br>(0.010)                 | <b>0.011</b> <sub>1</sub><br>( <b>0.009</b> ) | 0.011 <sub>2</sub><br>(0.010)                 | 0.011 <sub>4</sub><br>(0.010)                 |
| diabete   | 0.179 <sub>4</sub><br>(0.022)                 | <b>0.167</b> <sub>1</sub><br>( <b>0.014</b> ) | 0.169 <sub>2</sub><br>(0.015)                 | 0.171 <sub>3</sub><br>(0.015)                 |
| ecoli     | 0.254 <sub>4</sub><br>(0.050)                 | <b>0.032</b> <sub>1</sub><br>( <b>0.018</b> ) | 0.034 <sub>2</sub><br>(0.020)                 | 0.080 <sub>3</sub><br>(0.023)                 |
| flare     | 0.462 <sub>4</sub><br>(0.032)                 | <b>0.135</b> <sub>1</sub><br>( <b>0.008</b> ) | 0.136 <sub>2</sub><br>(0.008)                 | 0.186 <sub>3</sub><br>(0.005)                 |
| german    | 0.197 <sub>4</sub><br>(0.024)                 | 0.178 <sub>3</sub><br>(0.008)                 | 0.174 <sub>2</sub><br>(0.011)                 | <b>0.174</b> <sub>1</sub><br>( <b>0.010</b> ) |
| glass     | 0.303 <sub>4</sub><br>(0.069)                 | 0.208 <sub>2</sub><br>(0.017)                 | 0.209 <sub>3</sub><br>(0.024)                 | <b>0.208</b> <sub>1</sub><br>( <b>0.016</b> ) |
| heart-s   | 0.130 <sub>4</sub><br>(0.039)                 | <b>0.122</b> <sub>1</sub><br>( <b>0.028</b> ) | 0.123 <sub>3</sub><br>(0.030)                 | 0.123 <sub>2</sub><br>(0.031)                 |
| hepatit   | 0.308 <sub>4</sub><br>(0.097)                 | <b>0.112</b> <sub>1</sub><br>( <b>0.033</b> ) | 0.114 <sub>2</sub><br>(0.042)                 | 0.128 <sub>3</sub><br>(0.021)                 |
| horse     | 0.384 <sub>4</sub><br>(0.104)                 | 0.152 <sub>2</sub><br>(0.020)                 | <b>0.149</b> <sub>1</sub><br>( <b>0.023</b> ) | 0.202 <sub>3</sub><br>(0.019)                 |
| ionosph   | 0.099 <sub>4</sub><br>(0.030)                 | 0.087 <sub>2</sub><br>(0.021)                 | <b>0.085</b> <sub>1</sub><br>( <b>0.023</b> ) | 0.090 <sub>3</sub><br>(0.024)                 |
| iris      | 0.000 <sub>3</sub><br>(0.001)                 | <b>0.000</b> <sub>1</sub><br>( <b>0.000</b> ) | 0.001 <sub>2</sub><br>(0.002)                 | 0.000 <sub>4</sub><br>(0.001)                 |
| landsat   | 0.060 <sub>4</sub><br>(0.006)                 | 0.050 <sub>2</sub><br>(0.005)                 | <b>0.050</b> <sub>1</sub><br>( <b>0.005</b> ) | 0.057 <sub>3</sub><br>(0.006)                 |
| letter    | 0.021 <sub>3</sub><br>(0.001)                 | 0.021 <sub>2</sub><br>(0.001)                 | <b>0.020</b> <sub>1</sub><br>( <b>0.001</b> ) | 0.021 <sub>4</sub><br>(0.001)                 |
| libras-   | 0.038 <sub>4</sub><br>(0.021)                 | 0.029 <sub>2</sub><br>(0.014)                 | <b>0.029</b> <sub>1</sub><br>( <b>0.015</b> ) | 0.034 <sub>3</sub><br>(0.014)                 |
| lung-ca   | <b>0.039</b> <sub>1</sub><br>( <b>0.023</b> ) | 0.039 <sub>2</sub><br>(0.021)                 | 0.041 <sub>3</sub><br>(0.021)                 | 0.041 <sub>4</sub><br>(0.021)                 |
| mfeat-k   | 0.013 <sub>3</sub><br>(0.005)                 | <b>0.013</b> <sub>1</sub><br>( <b>0.004</b> ) | 0.013 <sub>2</sub><br>(0.004)                 | 0.014 <sub>4</sub><br>(0.005)                 |
| mfeat-m   | 0.002 <sub>3</sub><br>(0.002)                 | 0.001 <sub>2</sub><br>(0.002)                 | <b>0.001</b> <sub>1</sub><br>( <b>0.002</b> ) | 0.001 <sub>4</sub><br>(0.002)                 |
| mfeat-z   | 0.071 <sub>4</sub><br>(0.008)                 | 0.024 <sub>2</sub><br>(0.005)                 | <b>0.021</b> <sub>1</sub><br>( <b>0.006</b> ) | 0.043 <sub>3</sub><br>(0.004)                 |
| mushroo   | 0.078 <sub>4</sub><br>(0.008)                 | 0.074 <sub>3</sub><br>(0.005)                 | <b>0.062</b> <sub>1</sub><br>( <b>0.004</b> ) | 0.071 <sub>2</sub><br>(0.006)                 |
| optdigi   | 0.425 <sub>4</sub><br>(0.020)                 | <b>0.076</b> <sub>1</sub><br>( <b>0.002</b> ) | 0.084 <sub>3</sub><br>(0.006)                 | 0.083 <sub>2</sub><br>(0.001)                 |
| page-bl   | 0.091 <sub>4</sub><br>(0.009)                 | 0.062 <sub>2</sub><br>(0.004)                 | <b>0.057</b> <sub>1</sub><br>( <b>0.003</b> ) | 0.072 <sub>3</sub><br>(0.004)                 |
| pendigi   | 0.027 <sub>4</sub><br>(0.002)                 | <b>0.022</b> <sub>1</sub><br>( <b>0.002</b> ) | 0.026 <sub>3</sub><br>(0.002)                 | 0.023 <sub>2</sub><br>(0.002)                 |
| scene-c   | 0.382 <sub>4</sub><br>(0.021)                 | <b>0.148</b> <sub>1</sub><br>( <b>0.004</b> ) | 0.160 <sub>3</sub><br>(0.008)                 | 0.152 <sub>2</sub><br>(0.004)                 |
| segment   | 0.148 <sub>4</sub><br>(0.013)                 | 0.030 <sub>2</sub><br>(0.006)                 | <b>0.029</b> <sub>1</sub><br>( <b>0.006</b> ) | 0.066 <sub>3</sub><br>(0.004)                 |
| shuttle   | 0.098 <sub>4</sub><br>(0.001)                 | 0.083 <sub>2</sub><br>(0.001)                 | <b>0.069</b> <sub>1</sub><br>( <b>0.001</b> ) | 0.090 <sub>3</sub><br>(0.001)                 |
| sonar     | 0.265 <sub>4</sub><br>(0.063)                 | 0.182 <sub>2</sub><br>(0.029)                 | <b>0.177</b> <sub>1</sub><br>( <b>0.031</b> ) | 0.202 <sub>3</sub><br>(0.028)                 |
| spambas   | 0.177 <sub>4</sub><br>(0.011)                 | <b>0.111</b> <sub>1</sub><br>( <b>0.009</b> ) | 0.157 <sub>3</sub><br>(0.017)                 | 0.130 <sub>2</sub><br>(0.006)                 |
| tic-tac   | 0.201 <sub>4</sub><br>(0.007)                 | 0.196 <sub>2</sub><br>(0.010)                 | <b>0.194</b> <sub>1</sub><br>( <b>0.011</b> ) | 0.198 <sub>3</sub><br>(0.010)                 |
| vehicle   | 0.131 <sub>4</sub><br>(0.023)                 | 0.123 <sub>2</sub><br>(0.016)                 | <b>0.120</b> <sub>1</sub><br>( <b>0.015</b> ) | 0.126 <sub>3</sub><br>(0.018)                 |
| vowel     | 0.035 <sub>4</sub><br>(0.008)                 | <b>0.034</b> <sub>1</sub><br>( <b>0.008</b> ) | 0.034 <sub>2</sub><br>(0.009)                 | 0.035 <sub>3</sub><br>(0.009)                 |
| wavefor   | 0.108 <sub>4</sub><br>(0.008)                 | <b>0.094</b> <sub>1</sub><br>( <b>0.006</b> ) | 0.094 <sub>2</sub><br>(0.006)                 | 0.096 <sub>3</sub><br>(0.006)                 |
| wdbc      | 0.059 <sub>4</sub><br>(0.018)                 | 0.044 <sub>2</sub><br>(0.013)                 | <b>0.044</b> <sub>1</sub><br>( <b>0.013</b> ) | 0.057 <sub>3</sub><br>(0.017)                 |
| wdbc      | 0.260 <sub>4</sub><br>(0.054)                 | 0.177 <sub>2</sub><br>(0.017)                 | 0.180 <sub>3</sub><br>(0.028)                 | <b>0.177</b> <sub>1</sub><br>( <b>0.011</b> ) |
| yeast     | 0.393 <sub>4</sub><br>(0.140)                 | 0.187 <sub>2</sub><br>(0.006)                 | <b>0.184</b> <sub>1</sub><br>( <b>0.008</b> ) | 0.193 <sub>3</sub><br>(0.011)                 |
| zoo       | 0.019 <sub>4</sub><br>(0.030)                 | 0.018 <sub>3</sub><br>(0.028)                 | 0.018 <sub>2</sub><br>(0.028)                 | <b>0.018</b> <sub>1</sub><br>( <b>0.028</b> ) |
| rank      | 3.80                                          | 1.68                                          | 1.88                                          | 2.63                                          |

Table 4: Accuracy results for Naive Bayes in % (standard deviation in parentheses). Best results are marked in **bold** and subscript numbers indicate the ranks. Differences between results may occur after the third decimal digit. Results significant at  $3.201e-05$ , according to Friedman’s test.

| dataset   | uncalibrated                                   | beta                                           | isotonic                                       | logistic                                       |
|-----------|------------------------------------------------|------------------------------------------------|------------------------------------------------|------------------------------------------------|
| abalone   | 61.851 <sub>4</sub><br>(1.430)                 | 63.379 <sub>2</sub><br>(0.917)                 | <b>63.393</b> <sub>1</sub><br>( <b>1.045</b> ) | 63.043 <sub>3</sub><br>(1.314)                 |
| autos     | 68.503 <sub>4</sub><br>(8.098)                 | <b>72.031</b> <sub>1</sub><br>( <b>6.241</b> ) | 72.022 <sub>2</sub><br>(6.661)                 | 70.319 <sub>3</sub><br>(5.107)                 |
| balance   | 95.346 <sub>4</sub><br>(1.682)                 | <b>95.986</b> <sub>1</sub><br>( <b>2.023</b> ) | 95.794 <sub>3</sub><br>(2.146)                 | 95.986 <sub>2</sub><br>(2.063)                 |
| car       | <b>78.727</b> <sub>1</sub><br>( <b>2.223</b> ) | 78.513 <sub>4</sub><br>(2.269)                 | 78.704 <sub>2</sub><br>(2.212)                 | 78.641 <sub>3</sub><br>(2.243)                 |
| cleveland | <b>83.641</b> <sub>1</sub><br>( <b>4.615</b> ) | 83.441 <sub>3</sub><br>(4.642)                 | 83.239 <sub>4</sub><br>(4.250)                 | 83.540 <sub>2</sub><br>(4.703)                 |
| credit-   | 80.706 <sub>4</sub><br>(3.500)                 | 84.488 <sub>2</sub><br>(2.891)                 | <b>84.533</b> <sub>1</sub><br>( <b>2.972</b> ) | 81.458 <sub>3</sub><br>(3.341)                 |
| dermato   | 98.825 <sub>2,5</sub><br>(1.181)               | 98.825 <sub>2,5</sub><br>(1.181)               | 98.825 <sub>2,5</sub><br>(1.181)               | 98.825 <sub>2,5</sub><br>(1.181)               |
| diabete   | <b>75.389</b> <sub>1</sub><br>( <b>3.589</b> ) | 74.830 <sub>4</sub><br>(3.398)                 | 75.038 <sub>3</sub><br>(3.398)                 | 75.273 <sub>2</sub><br>(3.358)                 |
| ecoli     | 65.604 <sub>4</sub><br>(8.741)                 | <b>95.994</b> <sub>1</sub><br>( <b>2.595</b> ) | 95.753 <sub>2</sub><br>(2.879)                 | 93.703 <sub>3</sub><br>(3.113)                 |
| flare     | 50.918 <sub>4</sub><br>(3.326)                 | <b>82.289</b> <sub>1</sub><br>( <b>1.133</b> ) | 81.955 <sub>2</sub><br>(1.311)                 | 71.489 <sub>3</sub><br>(0.140)                 |
| german    | 72.930 <sub>3</sub><br>(2.770)                 | 72.510 <sub>4</sub><br>(1.973)                 | <b>74.020</b> <sub>1</sub><br>( <b>2.243</b> ) | 73.990 <sub>2</sub><br>(2.327)                 |
| glass     | 58.673 <sub>4</sub><br>(5.251)                 | <b>63.880</b> <sub>1</sub><br>( <b>3.605</b> ) | 63.824 <sub>2</sub><br>(6.312)                 | 63.521 <sub>3</sub><br>(3.769)                 |
| heart-s   | 84.296 <sub>3</sub><br>(5.051)                 | <b>84.481</b> <sub>1</sub><br>( <b>4.731</b> ) | 84.333 <sub>2</sub><br>(5.022)                 | 84.148 <sub>4</sub><br>(4.630)                 |
| hepatit   | 60.419 <sub>4</sub><br>(10.779)                | 84.343 <sub>2</sub><br>(5.538)                 | <b>84.416</b> <sub>1</sub><br>( <b>5.792</b> ) | 79.565 <sub>3</sub><br>(1.446)                 |
| horse     | 50.253 <sub>4</sub><br>(10.602)                | 80.428 <sub>2</sub><br>(3.822)                 | <b>81.092</b> <sub>1</sub><br>( <b>3.515</b> ) | 67.407 <sub>3</sub><br>(6.242)                 |
| ionosph   | 88.687 <sub>4</sub><br>(3.396)                 | 89.545 <sub>2</sub><br>(3.328)                 | <b>89.800</b> <sub>1</sub><br>( <b>3.685</b> ) | 89.344 <sub>3</sub><br>(3.365)                 |
| iris      | 100.000 <sub>2,5</sub><br>(0.000)              | 100.000 <sub>2,5</sub><br>(0.000)              | 100.000 <sub>2,5</sub><br>(0.000)              | 100.000 <sub>2,5</sub><br>(0.000)              |
| landsat   | 93.529 <sub>4</sub><br>(0.674)                 | 93.812 <sub>2</sub><br>(0.654)                 | <b>93.826</b> <sub>1</sub><br>( <b>0.666</b> ) | 93.616 <sub>3</sub><br>(0.694)                 |
| letter    | 97.264 <sub>2</sub><br>(0.109)                 | 97.246 <sub>3</sub><br>(0.201)                 | <b>97.363</b> <sub>1</sub><br>( <b>0.174</b> ) | 97.117 <sub>4</sub><br>(0.186)                 |
| libras-   | 95.160 <sub>4</sub><br>(2.659)                 | 96.293 <sub>2</sub><br>(2.038)                 | <b>96.293</b> <sub>1</sub><br>( <b>1.992</b> ) | 95.660 <sub>3</sub><br>(2.390)                 |
| lung-ca   | 94.779 <sub>1,5</sub><br>(3.512)               | 94.779 <sub>1,5</sub><br>(3.512)               | 93.732 <sub>4</sub><br>(3.669)                 | 93.942 <sub>3</sub><br>(3.566)                 |
| mfeat-k   | 98.395 <sub>2</sub><br>(0.600)                 | 98.370 <sub>4</sub><br>(0.579)                 | 98.385 <sub>3</sub><br>(0.609)                 | <b>98.400</b> <sub>1</sub><br>( <b>0.598</b> ) |
| mfeat-m   | 99.850 <sub>2,5</sub><br>(0.196)               | 99.850 <sub>2,5</sub><br>(0.196)               | 99.850 <sub>2,5</sub><br>(0.196)               | 99.850 <sub>2,5</sub><br>(0.196)               |
| mfeat-z   | 92.640 <sub>4</sub><br>(0.918)                 | 97.045 <sub>2</sub><br>(0.806)                 | <b>97.350</b> <sub>1</sub><br>( <b>0.751</b> ) | 93.165 <sub>3</sub><br>(0.815)                 |
| mushroo   | 90.971 <sub>3</sub><br>(1.057)                 | 90.314 <sub>4</sub><br>(0.703)                 | <b>92.613</b> <sub>1</sub><br>( <b>0.532</b> ) | 91.723 <sub>2</sub><br>(0.576)                 |
| optdigi   | 54.229 <sub>4</sub><br>(2.466)                 | 89.822 <sub>1,5</sub><br>(0.021)               | 88.465 <sub>3</sub><br>(1.854)                 | 89.822 <sub>1,5</sub><br>(0.021)               |
| page-bl   | 89.880 <sub>4</sub><br>(1.014)                 | 90.926 <sub>3</sub><br>(1.027)                 | <b>92.147</b> <sub>1</sub><br>( <b>0.463</b> ) | 91.139 <sub>2</sub><br>(0.937)                 |
| pendigi   | <b>97.233</b> <sub>1</sub><br>( <b>0.235</b> ) | 97.187 <sub>3</sub><br>(0.254)                 | 96.063 <sub>4</sub><br>(0.546)                 | 97.216 <sub>2</sub><br>(0.247)                 |
| scene-c   | 60.597 <sub>4</sub><br>(2.161)                 | 77.856 <sub>1,5</sub><br>(0.070)               | 73.972 <sub>3</sub><br>(3.862)                 | 77.856 <sub>1,5</sub><br>(0.070)               |
| segment   | 83.753 <sub>4</sub><br>(1.533)                 | 96.095 <sub>2</sub><br>(0.847)                 | <b>96.429</b> <sub>1</sub><br>( <b>0.753</b> ) | 90.039 <sub>3</sub><br>(1.360)                 |
| shuttle   | 89.458 <sub>4</sub><br>(0.172)                 | 89.489 <sub>3</sub><br>(0.146)                 | <b>89.916</b> <sub>1</sub><br>( <b>0.162</b> ) | 89.521 <sub>2</sub><br>(0.199)                 |
| sonar     | 68.125 <sub>4</sub><br>(7.382)                 | 71.225 <sub>2</sub><br>(7.470)                 | <b>73.008</b> <sub>1</sub><br>( <b>7.082</b> ) | 69.590 <sub>3</sub><br>(7.854)                 |
| spambas   | 81.387 <sub>3</sub><br>(1.272)                 | <b>84.210</b> <sub>1</sub><br>( <b>1.116</b> ) | 66.457 <sub>4</sub><br>(7.906)                 | 82.317 <sub>2</sub><br>(1.151)                 |
| tic-tac   | 71.314 <sub>4</sub><br>(1.837)                 | 71.314 <sub>3</sub><br>(2.679)                 | <b>71.543</b> <sub>1</sub><br>( <b>2.415</b> ) | 71.471 <sub>2</sub><br>(2.789)                 |
| vehicle   | 80.980 <sub>4</sub><br>(3.527)                 | 82.035 <sub>2</sub><br>(2.861)                 | <b>82.223</b> <sub>1</sub><br>( <b>2.927</b> ) | 81.572 <sub>3</sub><br>(2.837)                 |
| vowel     | 95.010 <sub>4</sub><br>(1.305)                 | 95.323 <sub>3</sub><br>(1.376)                 | 95.354 <sub>2</sub><br>(1.279)                 | <b>95.364</b> <sub>1</sub><br>( <b>1.317</b> ) |
| wavefor   | 85.590 <sub>4</sub><br>(1.174)                 | <b>86.388</b> <sub>1</sub><br>( <b>1.152</b> ) | 86.288 <sub>3</sub><br>(1.174)                 | 86.346 <sub>2</sub><br>(1.136)                 |
| wdbc      | 93.356 <sub>1,5</sub><br>(2.005)               | 93.338 <sub>3</sub><br>(1.959)                 | 93.249 <sub>4</sub><br>(1.979)                 | 93.356 <sub>1,5</sub><br>(2.005)               |
| wdbc      | 67.516 <sub>4</sub><br>(6.215)                 | 75.677 <sub>3</sub><br>(2.751)                 | 76.189 <sub>2</sub><br>(4.307)                 | <b>76.296</b> <sub>1</sub><br>( <b>0.710</b> ) |
| yeast     | 49.260 <sub>4</sub><br>(10.057)                | 69.117 <sub>2</sub><br>(1.362)                 | <b>69.606</b> <sub>1</sub><br>( <b>1.139</b> ) | 68.658 <sub>3</sub><br>(0.488)                 |
| zoo       | 98.258 <sub>2,5</sub><br>(3.024)               | 98.258 <sub>2,5</sub><br>(3.024)               | 98.258 <sub>2,5</sub><br>(3.024)               | 98.258 <sub>2,5</sub><br>(3.024)               |
| rank      | 3.24                                           | 2.28                                           | 2.00                                           | 2.48                                           |





Table 9: Brier score results for Ada-O (standard deviation in parentheses). Best results are marked in **bold** and subscript numbers indicate the ranks. Differences between results may occur after the third decimal digit. Results significant at  $3.745e-06$ , according to Friedman’s test.

| dataset   | uncalibrated                                  | beta                                          | isotonic                                      | logistic                                      |
|-----------|-----------------------------------------------|-----------------------------------------------|-----------------------------------------------|-----------------------------------------------|
| abalone   | 0.213 <sub>2</sub><br>(0.004)                 | <b>0.213</b> <sub>1</sub><br>(0.004)          | 0.214 <sub>4</sub><br>(0.005)                 | 0.214 <sub>3</sub><br>(0.004)                 |
| autos     | 0.074 <sub>2</sub><br>(0.030)                 | 0.078 <sub>3</sub><br>(0.024)                 | <b>0.071</b> <sub>1</sub><br>( <b>0.023</b> ) | 0.080 <sub>4</sub><br>(0.025)                 |
| balance   | 0.013 <sub>4</sub><br>(0.005)                 | 0.010 <sub>2</sub><br>(0.006)                 | 0.011 <sub>3</sub><br>(0.006)                 | <b>0.010</b> <sub>1</sub><br>( <b>0.006</b> ) |
| car       | 0.034 <sub>3</sub><br>(0.005)                 | 0.034 <sub>2</sub><br>(0.006)                 | <b>0.033</b> <sub>1</sub><br>( <b>0.006</b> ) | 0.035 <sub>4</sub><br>(0.007)                 |
| cleveland | 0.133 <sub>3</sub><br>(0.030)                 | 0.131 <sub>2</sub><br>(0.020)                 | <b>0.130</b> <sub>1</sub><br>( <b>0.020</b> ) | 0.133 <sub>4</sub><br>(0.022)                 |
| credit-   | <b>0.100</b> <sub>1</sub><br>( <b>0.018</b> ) | 0.101 <sub>4</sub><br>(0.015)                 | 0.101 <sub>3</sub><br>(0.016)                 | 0.100 <sub>2</sub><br>(0.016)                 |
| dermato   | 0.003 <sub>4</sub><br>(0.005)                 | 0.003 <sub>2</sub><br>(0.005)                 | <b>0.003</b> <sub>1</sub><br>( <b>0.005</b> ) | 0.003 <sub>3</sub><br>(0.005)                 |
| diabete   | 0.164 <sub>4</sub><br>(0.017)                 | <b>0.160</b> <sub>1</sub><br>( <b>0.011</b> ) | 0.161 <sub>2</sub><br>(0.013)                 | 0.163 <sub>3</sub><br>(0.012)                 |
| ecoli     | <b>0.036</b> <sub>1</sub><br>( <b>0.022</b> ) | 0.037 <sub>2</sub><br>(0.020)                 | 0.037 <sub>3</sub><br>(0.019)                 | 0.037 <sub>4</sub><br>(0.020)                 |
| flare     | 0.130 <sub>2</sub><br>(0.008)                 | <b>0.130</b> <sub>1</sub><br>( <b>0.008</b> ) | 0.131 <sub>4</sub><br>(0.009)                 | 0.130 <sub>3</sub><br>(0.009)                 |
| german    | 0.166 <sub>2</sub><br>(0.011)                 | 0.167 <sub>3</sub><br>(0.009)                 | 0.167 <sub>4</sub><br>(0.009)                 | <b>0.166</b> <sub>1</sub><br>( <b>0.008</b> ) |
| glass     | 0.158 <sub>4</sub><br>(0.037)                 | 0.157 <sub>3</sub><br>(0.023)                 | <b>0.153</b> <sub>1</sub><br>( <b>0.026</b> ) | 0.154 <sub>2</sub><br>(0.023)                 |
| heart-s   | 0.141 <sub>4</sub><br>(0.036)                 | 0.134 <sub>2</sub><br>(0.023)                 | <b>0.134</b> <sub>1</sub><br>( <b>0.026</b> ) | 0.139 <sub>3</sub><br>(0.025)                 |
| hepatit   | 0.134 <sub>4</sub><br>(0.047)                 | 0.124 <sub>2</sub><br>(0.022)                 | <b>0.123</b> <sub>1</sub><br>( <b>0.026</b> ) | 0.128 <sub>3</sub><br>(0.023)                 |
| horse     | 0.130 <sub>4</sub><br>(0.030)                 | <b>0.126</b> <sub>1</sub><br>( <b>0.021</b> ) | 0.126 <sub>2</sub><br>(0.023)                 | 0.127 <sub>3</sub><br>(0.020)                 |
| ionosph   | 0.061 <sub>4</sub><br>(0.018)                 | <b>0.057</b> <sub>1</sub><br>( <b>0.015</b> ) | 0.058 <sub>2</sub><br>(0.016)                 | 0.059 <sub>3</sub><br>(0.016)                 |
| iris      | 0.014 <sub>4</sub><br>(0.000)                 | 0.000 <sub>2</sub><br>(0.000)                 | <b>0.000</b> <sub>1</sub><br>( <b>0.000</b> ) | 0.000 <sub>3</sub><br>(0.000)                 |
| landsat   | 0.012 <sub>3</sub><br>(0.002)                 | <b>0.012</b> <sub>1</sub><br>( <b>0.002</b> ) | 0.012 <sub>2</sub><br>(0.002)                 | 0.013 <sub>4</sub><br>(0.003)                 |
| letter    | 0.010 <sub>3</sub><br>(0.001)                 | 0.010 <sub>2</sub><br>(0.001)                 | <b>0.010</b> <sub>1</sub><br>( <b>0.001</b> ) | 0.011 <sub>4</sub><br>(0.001)                 |
| libras-   | 0.025 <sub>4</sub><br>(0.014)                 | <b>0.022</b> <sub>1</sub><br>( <b>0.013</b> ) | 0.022 <sub>2</sub><br>(0.013)                 | 0.024 <sub>3</sub><br>(0.013)                 |
| lung-ca   | 0.040 <sub>4</sub><br>(0.020)                 | <b>0.032</b> <sub>1</sub><br>( <b>0.022</b> ) | 0.032 <sub>2</sub><br>(0.022)                 | 0.032 <sub>3</sub><br>(0.022)                 |
| mfeat-k   | 0.006 <sub>3</sub><br>(0.003)                 | <b>0.005</b> <sub>1</sub><br>( <b>0.003</b> ) | 0.006 <sub>2</sub><br>(0.003)                 | 0.006 <sub>4</sub><br>(0.003)                 |
| mfeat-m   | <b>0.002</b> <sub>1</sub><br>( <b>0.002</b> ) | 0.002 <sub>2</sub><br>(0.002)                 | 0.002 <sub>3</sub><br>(0.002)                 | 0.002 <sub>4</sub><br>(0.002)                 |
| mfeat-z   | 0.007 <sub>3</sub><br>(0.004)                 | <b>0.007</b> <sub>1</sub><br>( <b>0.003</b> ) | 0.007 <sub>2</sub><br>(0.003)                 | 0.008 <sub>4</sub><br>(0.004)                 |
| mushroo   | 0.000 <sub>4</sub><br>(0.000)                 | 0.000 <sub>3</sub><br>(0.000)                 | <b>0.000</b> <sub>1</sub><br>( <b>0.000</b> ) | 0.000 <sub>2</sub><br>(0.000)                 |
| optdigi   | 0.008 <sub>2</sub><br>(0.002)                 | <b>0.008</b> <sub>1</sub><br>( <b>0.002</b> ) | 0.008 <sub>3</sub><br>(0.002)                 | 0.009 <sub>4</sub><br>(0.002)                 |
| page-bl   | 0.027 <sub>3</sub><br>(0.004)                 | 0.026 <sub>2</sub><br>(0.003)                 | <b>0.026</b> <sub>1</sub><br>( <b>0.003</b> ) | 0.028 <sub>4</sub><br>(0.004)                 |
| pendigi   | 0.005 <sub>2</sub><br>(0.001)                 | <b>0.005</b> <sub>1</sub><br>( <b>0.001</b> ) | 0.005 <sub>3</sub><br>(0.001)                 | 0.005 <sub>4</sub><br>(0.001)                 |
| scene-c   | <b>0.115</b> <sub>1</sub><br>( <b>0.009</b> ) | 0.115 <sub>3</sub><br>(0.006)                 | 0.115 <sub>2</sub><br>(0.006)                 | 0.116 <sub>4</sub><br>(0.007)                 |
| segment   | 0.002 <sub>3</sub><br>(0.002)                 | <b>0.002</b> <sub>1</sub><br>( <b>0.001</b> ) | 0.002 <sub>2</sub><br>(0.002)                 | 0.002 <sub>4</sub><br>(0.002)                 |
| shuttle   | 0.000 <sub>3</sub><br>(0.000)                 | 0.000 <sub>4</sub><br>(0.000)                 | 0.000 <sub>2</sub><br>(0.000)                 | <b>0.000</b> <sub>1</sub><br>( <b>0.000</b> ) |
| sonar     | 0.135 <sub>3</sub><br>(0.043)                 | <b>0.127</b> <sub>1</sub><br>( <b>0.029</b> ) | 0.130 <sub>2</sub><br>(0.031)                 | 0.136 <sub>4</sub><br>(0.030)                 |
| spambas   | <b>0.044</b> <sub>1</sub><br>( <b>0.004</b> ) | 0.045 <sub>4</sub><br>(0.004)                 | 0.045 <sub>2</sub><br>(0.004)                 | 0.045 <sub>3</sub><br>(0.005)                 |
| tic-tac   | 0.118 <sub>4</sub><br>(0.010)                 | <b>0.107</b> <sub>1</sub><br>( <b>0.013</b> ) | 0.108 <sub>2</sub><br>(0.013)                 | 0.108 <sub>3</sub><br>(0.014)                 |
| vehicle   | <b>0.017</b> <sub>1</sub><br>( <b>0.006</b> ) | 0.017 <sub>2</sub><br>(0.005)                 | 0.018 <sub>4</sub><br>(0.006)                 | 0.018 <sub>3</sub><br>(0.006)                 |
| vowel     | 0.020 <sub>3</sub><br>(0.006)                 | 0.019 <sub>2</sub><br>(0.006)                 | <b>0.019</b> <sub>1</sub><br>( <b>0.006</b> ) | 0.020 <sub>4</sub><br>(0.007)                 |
| wavefor   | 0.079 <sub>2</sub><br>(0.006)                 | <b>0.079</b> <sub>1</sub><br>( <b>0.005</b> ) | 0.079 <sub>3</sub><br>(0.005)                 | 0.081 <sub>4</sub><br>(0.006)                 |
| wdbc      | 0.024 <sub>3</sub><br>(0.012)                 | <b>0.023</b> <sub>1</sub><br>( <b>0.011</b> ) | 0.024 <sub>2</sub><br>(0.011)                 | 0.024 <sub>4</sub><br>(0.012)                 |
| wdbc      | 0.173 <sub>4</sub><br>(0.032)                 | 0.162 <sub>2</sub><br>(0.015)                 | <b>0.160</b> <sub>1</sub><br>( <b>0.016</b> ) | 0.163 <sub>3</sub><br>(0.012)                 |
| yeast     | <b>0.173</b> <sub>1</sub><br>( <b>0.008</b> ) | 0.173 <sub>2</sub><br>(0.008)                 | 0.174 <sub>4</sub><br>(0.009)                 | 0.173 <sub>3</sub><br>(0.009)                 |
| zoo       | 0.016 <sub>4</sub><br>(0.004)                 | 0.002 <sub>2</sub><br>(0.003)                 | <b>0.002</b> <sub>1</sub><br>( <b>0.003</b> ) | 0.002 <sub>3</sub><br>(0.003)                 |
| rank      | 2.85                                          | 1.85                                          | 2.12                                          | 3.17                                          |

Table 10: Accuracy results for Ada-O in % (standard deviation in parentheses). Best results are marked in **bold** and subscript numbers indicate the ranks. Differences between results may occur after the third decimal digit. Results not significant, according to Friedman’s test (p-value = 0.813).

| dataset   | uncalibrated                                   | beta                                           | isotonic                                       | logistic                                       |
|-----------|------------------------------------------------|------------------------------------------------|------------------------------------------------|------------------------------------------------|
| abalone   | 63.907 <sub>3</sub><br>(1.218)                 | 63.969 <sub>2</sub><br>(0.642)                 | 63.009 <sub>4</sub><br>(1.899)                 | <b>64.089</b> <sub>1</sub><br>( <b>0.932</b> ) |
| autos     | 90.750 <sub>4</sub><br>(5.060)                 | 91.329 <sub>2</sub><br>(5.280)                 | <b>91.866</b> <sub>1</sub><br>( <b>5.014</b> ) | 90.821 <sub>3</sub><br>(5.024)                 |
| balance   | 98.606 <sub>4</sub><br>(1.122)                 | 98.703 <sub>2</sub><br>(1.109)                 | <b>98.704</b> <sub>1</sub><br>( <b>1.106</b> ) | 98.671 <sub>3</sub><br>(1.119)                 |
| car       | 95.226 <sub>2</sub><br>(0.990)                 | 95.162 <sub>3</sub><br>(0.952)                 | <b>95.295</b> <sub>1</sub><br>( <b>1.077</b> ) | 94.994 <sub>4</sub><br>(1.069)                 |
| cleveland | <b>82.417</b> <sub>1</sub><br>( <b>4.493</b> ) | 82.274 <sub>2</sub><br>(4.385)                 | 82.046 <sub>4</sub><br>(4.124)                 | 82.176 <sub>3</sub><br>(4.379)                 |
| credit-   | <b>86.617</b> <sub>1</sub><br>( <b>2.766</b> ) | 86.311 <sub>4</sub><br>(2.457)                 | 86.342 <sub>3</sub><br>(2.544)                 | 86.494 <sub>2</sub><br>(2.753)                 |
| dermato   | <b>99.638</b> <sub>1</sub><br>( <b>0.681</b> ) | 99.611 <sub>3</sub><br>(0.693)                 | 99.611 <sub>2</sub><br>(0.693)                 | 99.611 <sub>4</sub><br>(0.693)                 |
| diabete   | <b>75.573</b> <sub>1</sub><br>( <b>3.176</b> ) | 75.234 <sub>3</sub><br>(3.209)                 | 75.416 <sub>2</sub><br>(2.986)                 | 75.196 <sub>4</sub><br>(3.116)                 |
| ecoli     | <b>95.815</b> <sub>1</sub><br>( <b>2.766</b> ) | 95.700 <sub>2</sub><br>(2.834)                 | 95.695 <sub>3</sub><br>(2.669)                 | 95.639 <sub>4</sub><br>(2.863)                 |
| flare     | <b>82.296</b> <sub>1</sub><br>( <b>1.122</b> ) | 82.289 <sub>2</sub><br>(1.140)                 | 82.217 <sub>3</sub><br>(1.157)                 | 82.079 <sub>4</sub><br>(1.251)                 |
| german    | <b>76.210</b> <sub>1</sub><br>( <b>1.990</b> ) | 75.640 <sub>4</sub><br>(1.990)                 | 75.820 <sub>3</sub><br>(1.950)                 | 75.880 <sub>2</sub><br>(1.837)                 |
| glass     | <b>80.508</b> <sub>1</sub><br>( <b>4.813</b> ) | 79.671 <sub>3</sub><br>(4.888)                 | 79.564 <sub>4</sub><br>(4.653)                 | 80.436 <sub>2</sub><br>(4.857)                 |
| heart-s   | 81.333 <sub>4</sub><br>(5.222)                 | 81.444 <sub>2</sub><br>(4.544)                 | <b>81.741</b> <sub>1</sub><br>( <b>5.075</b> ) | 81.370 <sub>3</sub><br>(5.108)                 |
| hepatit   | <b>82.783</b> <sub>1</sub><br>( <b>6.004</b> ) | 81.647 <sub>4</sub><br>(4.494)                 | 81.883 <sub>2</sub><br>(5.051)                 | 81.879 <sub>3</sub><br>(4.452)                 |
| horse     | <b>83.845</b> <sub>1</sub><br>( <b>4.487</b> ) | 83.374 <sub>4</sub><br>(4.039)                 | 83.575 <sub>3</sub><br>(4.068)                 | 83.677 <sub>2</sub><br>(4.161)                 |
| ionosph   | 92.482 <sub>4</sub><br>(2.483)                 | <b>93.052</b> <sub>1</sub><br>( <b>2.392</b> ) | 92.909 <sub>2</sub><br>(2.474)                 | 92.711 <sub>3</sub><br>(2.489)                 |
| iris      | 100.000 <sub>2,5</sub><br>(0.000)              | 100.000 <sub>2,5</sub><br>(0.000)              | 100.000 <sub>2,5</sub><br>(0.000)              | 100.000 <sub>2,5</sub><br>(0.000)              |
| landsat   | <b>98.344</b> <sub>1</sub><br>( <b>0.355</b> ) | 98.340 <sub>2</sub><br>(0.353)                 | 98.308 <sub>4</sub><br>(0.370)                 | 98.337 <sub>3</sub><br>(0.356)                 |
| letter    | 98.653 <sub>3</sub><br>(0.134)                 | 98.644 <sub>4</sub><br>(0.129)                 | <b>98.730</b> <sub>1</sub><br>( <b>0.133</b> ) | 98.656 <sub>2</sub><br>(0.130)                 |
| libras-   | 97.187 <sub>4</sub><br>(1.437)                 | <b>97.613</b> <sub>1</sub><br>( <b>1.484</b> ) | 97.607 <sub>2</sub><br>(1.517)                 | 97.307 <sub>3</sub><br>(1.441)                 |
| lung-ca   | <b>97.295</b> <sub>1</sub><br>( <b>3.820</b> ) | 95.521 <sub>3</sub><br>(4.457)                 | 95.521 <sub>2</sub><br>(4.457)                 | 95.521 <sub>4</sub><br>(4.457)                 |
| mfeat-k   | 99.315 <sub>4</sub><br>(0.416)                 | <b>99.350</b> <sub>1</sub><br>( <b>0.378</b> ) | 99.340 <sub>2</sub><br>(0.387)                 | 99.325 <sub>3</sub><br>(0.405)                 |
| mfeat-m   | 99.800 <sub>2</sub><br>(0.208)                 | 99.800 <sub>2</sub><br>(0.208)                 | 99.785 <sub>4</sub><br>(0.202)                 | 99.800 <sub>1</sub><br>(0.208)                 |
| mfeat-z   | 99.065 <sub>3,5</sub><br>(0.522)               | 99.145 <sub>2</sub><br>(0.446)                 | <b>99.155</b> <sub>1</sub><br>( <b>0.463</b> ) | 99.065 <sub>3,5</sub><br>(0.487)               |
| mushroo   | 99.999 <sub>3,5</sub><br>(0.009)               | 100.000 <sub>1,5</sub><br>(0.009)              | 100.000 <sub>1,5</sub><br>(0.009)              | 99.999 <sub>3,5</sub><br>(0.009)               |
| optdigi   | 98.924 <sub>4</sub><br>(0.250)                 | 98.924 <sub>2</sub><br>(0.252)                 | <b>98.927</b> <sub>1</sub><br>( <b>0.269</b> ) | 98.917 <sub>3</sub><br>(0.249)                 |
| page-bl   | 96.516 <sub>2</sub><br>(0.481)                 | 96.468 <sub>3</sub><br>(0.512)                 | <b>96.552</b> <sub>1</sub><br>( <b>0.515</b> ) | 96.450 <sub>4</sub><br>(0.549)                 |
| pendigi   | 99.399 <sub>4</sub><br>(0.110)                 | 99.411 <sub>2</sub><br>(0.122)                 | 99.402 <sub>3</sub><br>(0.114)                 | <b>99.414</b> <sub>1</sub><br>( <b>0.124</b> ) |
| scene-c   | <b>84.130</b> <sub>1</sub><br>( <b>1.554</b> ) | 83.801 <sub>4</sub><br>(1.480)                 | 83.847 <sub>3</sub><br>(1.548)                 | 83.984 <sub>2</sub><br>(1.462)                 |
| segment   | 99.758 <sub>2</sub><br>(0.221)                 | 99.740 <sub>4</sub><br>(0.231)                 | 99.749 <sub>3</sub><br>(0.229)                 | <b>99.762</b> <sub>1</sub><br>( <b>0.220</b> ) |
| shuttle   | 99.995 <sub>3</sub><br>(0.006)                 | 99.994 <sub>4</sub><br>(0.006)                 | 99.995 <sub>2</sub><br>(0.006)                 | <b>99.995</b> <sub>1</sub><br>( <b>0.006</b> ) |
| sonar     | 82.592 <sub>2</sub><br>(6.334)                 | <b>82.727</b> <sub>1</sub><br>( <b>6.320</b> ) | 81.709 <sub>4</sub><br>(6.047)                 | 82.493 <sub>3</sub><br>(6.438)                 |
| spambas   | <b>94.371</b> <sub>1</sub><br>( <b>0.712</b> ) | 94.358 <sub>2</sub><br>(0.736)                 | 94.343 <sub>4</sub><br>(0.698)                 | 94.353 <sub>3</sub><br>(0.735)                 |
| tic-tac   | <b>83.913</b> <sub>1</sub><br>( <b>2.130</b> ) | 83.831 <sub>3</sub><br>(2.678)                 | 83.778 <sub>4</sub><br>(2.722)                 | 83.841 <sub>2</sub><br>(2.680)                 |
| vehicle   | 97.814 <sub>3</sub><br>(0.906)                 | 97.849 <sub>2</sub><br>(0.872)                 | 97.743 <sub>4</sub><br>(0.927)                 | <b>97.862</b> <sub>1</sub><br>( <b>0.934</b> ) |
| vowel     | 97.404 <sub>4</sub><br>(0.860)                 | <b>97.626</b> <sub>1</sub><br>( <b>0.891</b> ) | 97.606 <sub>2</sub><br>(0.906)                 | 97.424 <sub>3</sub><br>(0.861)                 |
| wavefor   | 88.676 <sub>4</sub><br>(0.989)                 | 88.706 <sub>2</sub><br>(0.938)                 | 88.680 <sub>3</sub><br>(0.895)                 | <b>88.722</b> <sub>1</sub><br>( <b>0.962</b> ) |
| wdbc      | 96.889 <sub>4</sub><br>(1.775)                 | 96.923 <sub>3</sub><br>(1.668)                 | 96.924 <sub>2</sub><br>(1.702)                 | <b>96.977</b> <sub>1</sub><br>( <b>1.748</b> ) |
| wdbc      | 77.678 <sub>2</sub><br>(4.915)                 | 77.382 <sub>3</sub><br>(3.023)                 | <b>78.615</b> <sub>1</sub><br>( <b>3.685</b> ) | 77.020 <sub>4</sub><br>(2.498)                 |
| yeast     | 73.075 <sub>2</sub><br>(2.200)                 | 73.042 <sub>4</sub><br>(2.137)                 | 73.075 <sub>3</sub><br>(2.219)                 | <b>73.137</b> <sub>1</sub><br>( <b>2.216</b> ) |
| zoo       | 100.000 <sub>2,5</sub><br>(0.000)              | 100.000 <sub>2,5</sub><br>(0.000)              | 100.000 <sub>2,5</sub><br>(0.000)              | 100.000 <sub>2,5</sub><br>(0.000)              |
| rank      | 2.34                                           | 2.55                                           | 2.52                                           | 2.59                                           |







Table 15: Brier score results for Ada-S (standard deviation in parentheses). Best results are marked in **bold** and subscript numbers indicate the ranks. Differences between results may occur after the third decimal digit. Results significant at  $5.836e-13$ , according to Friedman’s test.

| dataset   | uncalibrated                                  | beta                                          | isotonic                                      | logistic                                      |
|-----------|-----------------------------------------------|-----------------------------------------------|-----------------------------------------------|-----------------------------------------------|
| abalone   | 0.249 <sub>4</sub><br>(0.000)                 | 0.220 <sub>2</sub><br>(0.003)                 | <b>0.214</b> <sub>1</sub><br>( <b>0.003</b> ) | 0.222 <sub>3</sub><br>(0.003)                 |
| autos     | 0.165 <sub>4</sub><br>(0.010)                 | 0.074 <sub>2</sub><br>(0.025)                 | <b>0.069</b> <sub>1</sub><br>( <b>0.024</b> ) | 0.076 <sub>3</sub><br>(0.022)                 |
| balance   | 0.225 <sub>4</sub><br>(0.001)                 | <b>0.009</b> <sub>1</sub><br>( <b>0.006</b> ) | 0.009 <sub>3</sub><br>(0.006)                 | 0.009 <sub>2</sub><br>(0.006)                 |
| car       | 0.229 <sub>4</sub><br>(0.001)                 | 0.032 <sub>2</sub><br>(0.006)                 | 0.034 <sub>3</sub><br>(0.006)                 | <b>0.033</b> <sub>1</sub><br>( <b>0.006</b> ) |
| cleveland | 0.238 <sub>4</sub><br>(0.002)                 | 0.155 <sub>2</sub><br>(0.018)                 | <b>0.151</b> <sub>1</sub><br>( <b>0.021</b> ) | 0.156 <sub>3</sub><br>(0.017)                 |
| credit-   | 0.241 <sub>4</sub><br>(0.001)                 | 0.121 <sub>2</sub><br>(0.013)                 | <b>0.115</b> <sub>1</sub><br>( <b>0.013</b> ) | 0.124 <sub>3</sub><br>(0.013)                 |
| dermato   | <b>0.006</b> <sub>1</sub><br>( <b>0.009</b> ) | 0.006 <sub>3</sub><br>(0.009)                 | 0.007 <sub>4</sub><br>(0.009)                 | 0.006 <sub>2</sub><br>(0.009)                 |
| diabete   | 0.245 <sub>4</sub><br>(0.001)                 | 0.178 <sub>2</sub><br>(0.007)                 | <b>0.172</b> <sub>1</sub><br>( <b>0.011</b> ) | 0.184 <sub>3</sub><br>(0.007)                 |
| ecoli     | 0.125 <sub>4</sub><br>(0.021)                 | 0.037 <sub>2</sub><br>(0.019)                 | 0.037 <sub>3</sub><br>(0.019)                 | <b>0.037</b> <sub>1</sub><br>( <b>0.019</b> ) |
| flare     | 0.227 <sub>4</sub><br>(0.006)                 | 0.132 <sub>2</sub><br>(0.008)                 | <b>0.131</b> <sub>1</sub><br>( <b>0.009</b> ) | 0.133 <sub>3</sub><br>(0.008)                 |
| german    | 0.248 <sub>4</sub><br>(0.000)                 | 0.184 <sub>2</sub><br>(0.007)                 | <b>0.178</b> <sub>1</sub><br>( <b>0.008</b> ) | 0.190 <sub>3</sub><br>(0.006)                 |
| glass     | 0.233 <sub>4</sub><br>(0.003)                 | 0.162 <sub>2</sub><br>(0.019)                 | <b>0.156</b> <sub>1</sub><br>( <b>0.023</b> ) | 0.167 <sub>3</sub><br>(0.017)                 |
| heart-s   | 0.236 <sub>4</sub><br>(0.002)                 | 0.154 <sub>2</sub><br>(0.020)                 | <b>0.154</b> <sub>1</sub><br>( <b>0.025</b> ) | 0.155 <sub>3</sub><br>(0.019)                 |
| hepatit   | 0.186 <sub>4</sub><br>(0.012)                 | 0.124 <sub>3</sub><br>(0.020)                 | <b>0.122</b> <sub>1</sub><br>( <b>0.026</b> ) | 0.123 <sub>2</sub><br>(0.020)                 |
| horse     | 0.226 <sub>4</sub><br>(0.003)                 | 0.132 <sub>2</sub><br>(0.019)                 | <b>0.132</b> <sub>1</sub><br>( <b>0.022</b> ) | 0.136 <sub>3</sub><br>(0.018)                 |
| ionosph   | 0.171 <sub>4</sub><br>(0.007)                 | <b>0.054</b> <sub>1</sub><br>( <b>0.015</b> ) | 0.054 <sub>3</sub><br>(0.016)                 | 0.054 <sub>2</sub><br>(0.015)                 |
| iris      | 0.000 <sub>2</sub><br>(0.000)                 | 0.000 <sub>3</sub><br>(0.000)                 | <b>0.000</b> <sub>1</sub><br>( <b>0.000</b> ) | 0.000 <sub>4</sub><br>(0.000)                 |
| landsat   | 0.208 <sub>4</sub><br>(0.003)                 | <b>0.010</b> <sub>1</sub><br>( <b>0.002</b> ) | 0.010 <sub>2</sub><br>(0.002)                 | 0.010 <sub>3</sub><br>(0.002)                 |
| letter    | 0.193 <sub>4</sub><br>(0.001)                 | 0.006 <sub>2</sub><br>(0.001)                 | <b>0.006</b> <sub>1</sub><br>( <b>0.001</b> ) | 0.006 <sub>3</sub><br>(0.001)                 |
| libras-   | 0.052 <sub>4</sub><br>(0.010)                 | 0.021 <sub>2</sub><br>(0.013)                 | <b>0.021</b> <sub>1</sub><br>( <b>0.013</b> ) | 0.021 <sub>3</sub><br>(0.012)                 |
| lung-ca   | <b>0.027</b> <sub>1</sub><br>( <b>0.024</b> ) | 0.032 <sub>2</sub><br>(0.022)                 | 0.032 <sub>3</sub><br>(0.022)                 | 0.032 <sub>4</sub><br>(0.022)                 |
| mfeat-k   | 0.137 <sub>4</sub><br>(0.009)                 | <b>0.006</b> <sub>1</sub><br>( <b>0.003</b> ) | 0.006 <sub>3</sub><br>(0.003)                 | 0.006 <sub>2</sub><br>(0.003)                 |
| mfeat-m   | 0.009 <sub>4</sub><br>(0.004)                 | <b>0.002</b> <sub>1</sub><br>( <b>0.002</b> ) | 0.003 <sub>3</sub><br>(0.002)                 | 0.002 <sub>2</sub><br>(0.002)                 |
| mfeat-z   | 0.091 <sub>4</sub><br>(0.011)                 | <b>0.007</b> <sub>1</sub><br>( <b>0.003</b> ) | 0.007 <sub>3</sub><br>(0.003)                 | 0.007 <sub>2</sub><br>(0.003)                 |
| mushroo   | 0.175 <sub>4</sub><br>(0.002)                 | 0.000 <sub>2</sub><br>(0.000)                 | <b>0.000</b> <sub>1</sub><br>( <b>0.000</b> ) | 0.000 <sub>3</sub><br>(0.000)                 |
| optdigi   | 0.192 <sub>4</sub><br>(0.005)                 | 0.008 <sub>2</sub><br>(0.002)                 | <b>0.008</b> <sub>1</sub><br>( <b>0.002</b> ) | 0.008 <sub>3</sub><br>(0.002)                 |
| page-bl   | 0.235 <sub>4</sub><br>(0.001)                 | 0.024 <sub>2</sub><br>(0.003)                 | <b>0.023</b> <sub>1</sub><br>( <b>0.003</b> ) | 0.025 <sub>3</sub><br>(0.003)                 |
| pendigi   | 0.145 <sub>4</sub><br>(0.005)                 | 0.003 <sub>2</sub><br>(0.001)                 | <b>0.003</b> <sub>1</sub><br>( <b>0.001</b> ) | 0.003 <sub>3</sub><br>(0.001)                 |
| scene-c   | 0.231 <sub>4</sub><br>(0.003)                 | 0.123 <sub>2</sub><br>(0.005)                 | <b>0.120</b> <sub>1</sub><br>( <b>0.005</b> ) | 0.126 <sub>3</sub><br>(0.004)                 |
| segment   | 0.050 <sub>4</sub><br>(0.008)                 | 0.002 <sub>2</sub><br>(0.001)                 | 0.002 <sub>3</sub><br>(0.001)                 | <b>0.002</b> <sub>1</sub><br>( <b>0.001</b> ) |
| shuttle   | 0.146 <sub>4</sub><br>(0.009)                 | <b>0.000</b> <sub>1</sub><br>( <b>0.000</b> ) | 0.000 <sub>3</sub><br>(0.000)                 | 0.000 <sub>2</sub><br>(0.000)                 |
| sonar     | 0.214 <sub>4</sub><br>(0.004)                 | <b>0.131</b> <sub>1</sub><br>( <b>0.029</b> ) | 0.132 <sub>3</sub><br>(0.031)                 | 0.131 <sub>2</sub><br>(0.029)                 |
| spambas   | 0.227 <sub>4</sub><br>(0.002)                 | 0.047 <sub>2</sub><br>(0.003)                 | <b>0.043</b> <sub>1</sub><br>( <b>0.004</b> ) | 0.047 <sub>3</sub><br>(0.003)                 |
| tic-tac   | 0.248 <sub>4</sub><br>(0.000)                 | 0.045 <sub>2</sub><br>(0.009)                 | <b>0.043</b> <sub>1</sub><br>( <b>0.010</b> ) | 0.045 <sub>3</sub><br>(0.009)                 |
| vehicle   | 0.192 <sub>4</sub><br>(0.004)                 | <b>0.018</b> <sub>1</sub><br>( <b>0.005</b> ) | 0.018 <sub>3</sub><br>(0.006)                 | 0.018 <sub>2</sub><br>(0.005)                 |
| vowel     | 0.123 <sub>4</sub><br>(0.004)                 | 0.017 <sub>2</sub><br>(0.006)                 | <b>0.017</b> <sub>1</sub><br>( <b>0.006</b> ) | 0.017 <sub>3</sub><br>(0.005)                 |
| wavefor   | 0.238 <sub>4</sub><br>(0.002)                 | 0.080 <sub>2</sub><br>(0.004)                 | <b>0.079</b> <sub>1</sub><br>( <b>0.004</b> ) | 0.081 <sub>3</sub><br>(0.004)                 |
| wdbc      | 0.121 <sub>4</sub><br>(0.011)                 | <b>0.024</b> <sub>1</sub><br>( <b>0.010</b> ) | 0.024 <sub>3</sub><br>(0.010)                 | 0.024 <sub>2</sub><br>(0.009)                 |
| wdbc      | 0.216 <sub>4</sub><br>(0.006)                 | 0.164 <sub>3</sub><br>(0.013)                 | <b>0.163</b> <sub>1</sub><br>( <b>0.017</b> ) | 0.164 <sub>2</sub><br>(0.012)                 |
| yeast     | 0.240 <sub>4</sub><br>(0.001)                 | 0.185 <sub>2</sub><br>(0.004)                 | <b>0.175</b> <sub>1</sub><br>( <b>0.006</b> ) | 0.186 <sub>3</sub><br>(0.003)                 |
| zoo       | <b>0.002</b> <sub>1</sub><br>( <b>0.003</b> ) | 0.002 <sub>4</sub><br>(0.003)                 | 0.002 <sub>3</sub><br>(0.003)                 | 0.002 <sub>2</sub><br>(0.003)                 |
| rank      | 3.73                                          | 1.90                                          | 1.76                                          | 2.61                                          |

Table 16: Accuracy results for Ada-S in % (standard deviation in parentheses). Best results are marked in **bold** and subscript numbers indicate the ranks. Differences between results may occur after the third decimal digit. Results not significant, according to Friedman’s test (p-value = 0.660).

| dataset   | uncalibrated                                   | beta                                           | isotonic                                       | logistic                                       |
|-----------|------------------------------------------------|------------------------------------------------|------------------------------------------------|------------------------------------------------|
| abalone   | 63.304 <sub>4</sub><br>(1.430)                 | <b>63.778</b> <sub>1</sub><br>( <b>0.329</b> ) | 63.636 <sub>3</sub><br>(0.803)                 | 63.696 <sub>2</sub><br>(0.308)                 |
| autos     | 91.495 <sub>4</sub><br>(4.969)                 | 91.609 <sub>3</sub><br>(4.483)                 | <b>92.006</b> <sub>1</sub><br>( <b>4.291</b> ) | 91.674 <sub>2</sub><br>(4.618)                 |
| balance   | 98.830 <sub>4</sub><br>(1.015)                 | 98.975 <sub>3</sub><br>(1.097)                 | 98.976 <sub>2</sub><br>(1.058)                 | <b>99.023</b> <sub>1</sub><br>( <b>1.064</b> ) |
| car       | 95.034 <sub>4</sub><br>(1.059)                 | 95.156 <sub>3</sub><br>(1.101)                 | <b>95.168</b> <sub>1</sub><br>( <b>1.072</b> ) | 95.156 <sub>2</sub><br>(1.111)                 |
| cleveland | <b>79.483</b> <sub>1</sub><br>( <b>4.701</b> ) | 78.227 <sub>2</sub><br>(5.020)                 | 78.532 <sub>3</sub><br>(5.020)                 | 78.363 <sub>4</sub><br>(5.046)                 |
| credit-   | 84.258 <sub>2</sub><br>(0.001)                 | 83.968 <sub>3</sub><br>(2.464)                 | <b>84.382</b> <sub>1</sub><br>( <b>2.461</b> ) | 83.877 <sub>4</sub><br>(2.735)                 |
| dermato   | 99.408 <sub>2</sub><br>(1.111)                 | 99.408 <sub>3</sub><br>(1.111)                 | 99.297 <sub>4</sub><br>(1.185)                 | 99.408 <sub>1</sub><br>(1.111)                 |
| diabete   | <b>74.115</b> <sub>1</sub><br>( <b>2.873</b> ) | 73.591 <sub>3</sub><br>(2.166)                 | 73.945 <sub>2</sub><br>(2.649)                 | 72.070 <sub>4</sub><br>(2.658)                 |
| ecoli     | <b>96.083</b> <sub>1</sub><br>( <b>2.450</b> ) | 95.725 <sub>4</sub><br>(2.574)                 | 95.791 <sub>2</sub><br>(2.485)                 | 95.783 <sub>3</sub><br>(2.523)                 |
| flare     | 82.145 <sub>4</sub><br>(1.267)                 | 82.260 <sub>3,5</sub><br>(1.135)               | 82.195 <sub>2</sub><br>(1.264)                 | 82.260 <sub>1,5</sub><br>(1.135)               |
| german    | <b>73.810</b> <sub>1</sub><br>( <b>2.470</b> ) | 71.530 <sub>3</sub><br>(2.088)                 | 73.470 <sub>2</sub><br>(1.968)                 | 70.560 <sub>4</sub><br>(1.155)                 |
| glass     | <b>80.460</b> <sub>1</sub><br>( <b>4.919</b> ) | 79.168 <sub>3</sub><br>(5.608)                 | 79.518 <sub>2</sub><br>(5.074)                 | 78.516 <sub>4</sub><br>(4.386)                 |
| heart-s   | <b>79.074</b> <sub>1</sub><br>( <b>5.347</b> ) | 78.222 <sub>3</sub><br>(5.083)                 | 77.963 <sub>4</sub><br>(5.603)                 | 78.333 <sub>2</sub><br>(5.360)                 |
| hepatit   | <b>82.916</b> <sub>1</sub><br>( <b>6.088</b> ) | 80.733 <sub>4</sub><br>(4.211)                 | 82.318 <sub>2</sub><br>(5.145)                 | 81.697 <sub>3</sub><br>(4.561)                 |
| horse     | <b>83.870</b> <sub>1</sub><br>( <b>4.325</b> ) | 83.038 <sub>4</sub><br>(3.929)                 | 83.065 <sub>3</sub><br>(4.199)                 | 83.373 <sub>2</sub><br>(3.849)                 |
| ionosph   | <b>93.336</b> <sub>1</sub><br>( <b>2.652</b> ) | 93.223 <sub>3</sub><br>(2.511)                 | 93.194 <sub>4</sub><br>(2.539)                 | 93.336 <sub>2</sub><br>(2.392)                 |
| iris      | 100.000 <sub>2,5</sub><br>(0.000)              | 100.000 <sub>2,5</sub><br>(0.000)              | 100.000 <sub>2,5</sub><br>(0.000)              | 100.000 <sub>2,5</sub><br>(0.000)              |
| landsat   | 98.636 <sub>4</sub><br>(0.003)                 | 98.645 <sub>3</sub><br>(0.343)                 | <b>98.662</b> <sub>1</sub><br>( <b>0.337</b> ) | 98.651 <sub>2</sub><br>(0.347)                 |
| letter    | <b>99.202</b> <sub>1</sub><br>( <b>0.099</b> ) | 99.200 <sub>2</sub><br>(0.102)                 | 99.200 <sub>3</sub><br>(0.098)                 | 99.198 <sub>4</sub><br>(0.102)                 |
| libras-   | 97.080 <sub>4</sub><br>(1.580)                 | <b>97.693</b> <sub>1</sub><br>( <b>1.809</b> ) | 97.607 <sub>3</sub><br>(1.802)                 | 97.640 <sub>2</sub><br>(1.811)                 |
| lung-ca   | <b>97.295</b> <sub>1</sub><br>( <b>3.820</b> ) | 95.621 <sub>2</sub><br>(4.386)                 | 95.521 <sub>3,5</sub><br>(4.457)               | 95.521 <sub>3,5</sub><br>(4.457)               |
| mfeat-k   | <b>99.330</b> <sub>1</sub><br>( <b>0.393</b> ) | 99.325 <sub>2</sub><br>(0.347)                 | 99.280 <sub>4</sub><br>(0.345)                 | 99.315 <sub>3</sub><br>(0.349)                 |
| mfeat-m   | 99.765 <sub>4</sub><br>(0.211)                 | 99.775 <sub>2</sub><br>(0.216)                 | <b>99.790</b> <sub>1</sub><br>( <b>0.210</b> ) | 99.770 <sub>3</sub><br>(0.213)                 |
| mfeat-z   | 99.155 <sub>4</sub><br>(0.011)                 | 99.185 <sub>3</sub><br>(0.413)                 | 99.185 <sub>2</sub><br>(0.403)                 | <b>99.195</b> <sub>1</sub><br>( <b>0.402</b> ) |
| mushroo   | 100.000 <sub>2,5</sub><br>(0.000)              | 100.000 <sub>2,5</sub><br>(0.000)              | 100.000 <sub>2,5</sub><br>(0.000)              | 100.000 <sub>2,5</sub><br>(0.000)              |
| optdigi   | 98.899 <sub>4</sub><br>(0.289)                 | 98.925 <sub>2</sub><br>(0.281)                 | <b>98.941</b> <sub>1</sub><br>( <b>0.286</b> ) | 98.918 <sub>3</sub><br>(0.289)                 |
| page-bl   | 96.996 <sub>2</sub><br>(0.461)                 | 96.998 <sub>3</sub><br>(0.426)                 | <b>97.047</b> <sub>1</sub><br>( <b>0.489</b> ) | 96.867 <sub>4</sub><br>(0.470)                 |
| pendigi   | 99.674 <sub>2</sub><br>(0.115)                 | 99.671 <sub>3</sub><br>(0.118)                 | <b>99.690</b> <sub>1</sub><br>( <b>0.107</b> ) | 99.660 <sub>4</sub><br>(0.122)                 |
| scene-c   | <b>83.224</b> <sub>1</sub><br>( <b>1.450</b> ) | 82.526 <sub>3</sub><br>(1.168)                 | 83.057 <sub>2</sub><br>(1.388)                 | 81.495 <sub>4</sub><br>(1.105)                 |
| segment   | 99.732 <sub>4</sub><br>(0.250)                 | 99.740 <sub>2</sub><br>(0.219)                 | 99.732 <sub>3</sub><br>(0.217)                 | <b>99.753</b> <sub>1</sub><br>( <b>0.205</b> ) |
| shuttle   | 99.995 <sub>4</sub><br>(0.009)                 | 99.998 <sub>2</sub><br>(0.006)                 | 99.997 <sub>3</sub><br>(0.006)                 | <b>99.998</b> <sub>1</sub><br>( <b>0.005</b> ) |
| sonar     | 81.865 <sub>3</sub><br>(6.839)                 | 81.893 <sub>2</sub><br>(6.172)                 | <b>82.101</b> <sub>1</sub><br>( <b>6.085</b> ) | 81.851 <sub>4</sub><br>(6.459)                 |
| spambas   | 94.256 <sub>4</sub><br>(0.637)                 | 94.523 <sub>2</sub><br>(0.618)                 | <b>94.590</b> <sub>1</sub><br>( <b>0.571</b> ) | 94.508 <sub>3</sub><br>(0.573)                 |
| tic-tac   | 91.618 <sub>4</sub><br>(2.118)                 | <b>95.189</b> <sub>1</sub><br>( <b>1.469</b> ) | 95.074 <sub>3</sub><br>(1.495)                 | 95.178 <sub>2</sub><br>(1.458)                 |
| vehicle   | 97.766 <sub>3</sub><br>(0.941)                 | 97.849 <sub>2</sub><br>(1.009)                 | 97.672 <sub>4</sub><br>(0.970)                 | <b>97.861</b> <sub>1</sub><br>( <b>0.967</b> ) |
| vowel     | 97.455 <sub>4</sub><br>(0.866)                 | 97.960 <sub>2</sub><br>(1.030)                 | <b>98.030</b> <sub>1</sub><br>( <b>0.903</b> ) | 97.909 <sub>3</sub><br>(0.973)                 |
| wavefor   | 88.830 <sub>4</sub><br>(0.788)                 | 88.986 <sub>2</sub><br>(0.773)                 | 88.974 <sub>3</sub><br>(0.720)                 | <b>88.996</b> <sub>1</sub><br>( <b>0.827</b> ) |
| wdbc      | <b>97.082</b> <sub>1</sub><br>( <b>1.437</b> ) | 97.011 <sub>2</sub><br>(1.668)                 | 96.801 <sub>4</sub><br>(1.833)                 | 96.958 <sub>3</sub><br>(1.643)                 |
| wdbc      | <b>77.806</b> <sub>1</sub><br>( <b>4.605</b> ) | 76.605 <sub>3</sub><br>(2.390)                 | 76.876 <sub>2</sub><br>(4.008)                 | 76.457 <sub>4</sub><br>(2.117)                 |
| yeast     | <b>72.639</b> <sub>1</sub><br>( <b>2.076</b> ) | 69.177 <sub>4</sub><br>(0.654)                 | 72.143 <sub>2</sub><br>(1.689)                 | 69.251 <sub>3</sub><br>(0.814)                 |
| zoo       | 100.000 <sub>2,5</sub><br>(0.000)              | 100.000 <sub>2,5</sub><br>(0.000)              | 100.000 <sub>2,5</sub><br>(0.000)              | 100.000 <sub>2,5</sub><br>(0.000)              |
| rank      | 2.48                                           | 2.56                                           | 2.32                                           | 2.65                                           |

Table 17: Log-loss results for Ada-S (standard deviation in parentheses). Best results are marked in **bold** and subscript numbers indicate the ranks. Differences between results may occur after the third decimal digit. Results significant at  $2.799e-17$ , according to Friedman’s test.

| dataset   | uncalibrated                                  | beta                                          | beta[m = 1/2]                                 | beta[a=b]                                     | logistic                                      |
|-----------|-----------------------------------------------|-----------------------------------------------|-----------------------------------------------|-----------------------------------------------|-----------------------------------------------|
| abalone   | 0.691 <sub>5</sub><br>(0.000)                 | <b>0.632</b> <sub>1</sub><br>( <b>0.007</b> ) | 0.632 <sub>2</sub><br>(0.011)                 | 0.635 <sub>3</sub><br>(0.008)                 | 0.635 <sub>4</sub><br>(0.008)                 |
| autos     | 0.517 <sub>5</sub><br>(0.022)                 | 0.278 <sub>2</sub><br>(0.082)                 | <b>0.277</b> <sub>1</sub><br>( <b>0.077</b> ) | 0.285 <sub>4</sub><br>(0.069)                 | 0.282 <sub>3</sub><br>(0.068)                 |
| balance   | 0.643 <sub>5</sub><br>(0.003)                 | <b>0.032</b> <sub>1</sub><br>( <b>0.023</b> ) | 0.036 <sub>4</sub><br>(0.030)                 | 0.034 <sub>3</sub><br>(0.033)                 | 0.032 <sub>2</sub><br>(0.023)                 |
| car       | 0.650 <sub>5</sub><br>(0.002)                 | 0.108 <sub>3</sub><br>(0.017)                 | <b>0.108</b> <sub>1</sub><br>( <b>0.017</b> ) | 0.108 <sub>2</sub><br>(0.017)                 | 0.108 <sub>4</sub><br>(0.017)                 |
| cleveland | 0.670 <sub>5</sub><br>(0.003)                 | <b>0.482</b> <sub>1</sub><br>( <b>0.046</b> ) | 0.483 <sub>2</sub><br>(0.045)                 | 0.484 <sub>4</sub><br>(0.040)                 | 0.484 <sub>3</sub><br>(0.040)                 |
| credit    | 0.675 <sub>5</sub><br>(0.002)                 | 0.403 <sub>2</sub><br>(0.039)                 | <b>0.403</b> <sub>1</sub><br>( <b>0.038</b> ) | 0.412 <sub>4</sub><br>(0.044)                 | 0.412 <sub>3</sub><br>(0.044)                 |
| dermato   | 0.044 <sub>3</sub><br>(0.101)                 | 0.042 <sub>2</sub><br>(0.077)                 | <b>0.041</b><br>( <b>0.074</b> )              | 0.045 <sub>4</sub><br>(0.082)                 | 0.051 <sub>5</sub><br>(0.096)                 |
| diabete   | 0.683 <sub>5</sub><br>(0.002)                 | <b>0.537</b> <sub>1</sub><br>( <b>0.020</b> ) | 0.543 <sub>2</sub><br>(0.023)                 | 0.554 <sub>4</sub><br>(0.023)                 | 0.554 <sub>3</sub><br>(0.023)                 |
| ecoli     | 0.427 <sub>5</sub><br>(0.053)                 | 0.149 <sub>4</sub><br>(0.074)                 | 0.147 <sub>2</sub><br>(0.065)                 | 0.147 <sub>3</sub><br>(0.068)                 | <b>0.146</b> <sub>1</sub><br>( <b>0.069</b> ) |
| flare     | 0.646 <sub>5</sub><br>(0.013)                 | <b>0.415</b> <sub>1</sub><br>( <b>0.021</b> ) | 0.433 <sub>4</sub><br>(0.033)                 | 0.415 <sub>2</sub><br>(0.021)                 | 0.416 <sub>3</sub><br>(0.021)                 |
| german    | 0.688 <sub>5</sub><br>(0.001)                 | <b>0.550</b> <sub>1</sub><br>( <b>0.018</b> ) | 0.557 <sub>2</sub><br>(0.023)                 | 0.563 <sub>3</sub><br>(0.016)                 | 0.563 <sub>4</sub><br>(0.016)                 |
| glass     | 0.659 <sub>5</sub><br>(0.006)                 | <b>0.502</b> <sub>1</sub><br>( <b>0.044</b> ) | 0.504 <sub>2</sub><br>(0.045)                 | 0.516 <sub>4</sub><br>(0.044)                 | 0.516 <sub>3</sub><br>(0.044)                 |
| heart-s   | 0.665 <sub>5</sub><br>(0.004)                 | <b>0.479</b> <sub>1</sub><br>( <b>0.051</b> ) | 0.480 <sub>2</sub><br>(0.048)                 | 0.484 <sub>4</sub><br>(0.046)                 | 0.484 <sub>3</sub><br>(0.046)                 |
| hepatit   | 0.562 <sub>5</sub><br>(0.025)                 | 0.389 <sub>3</sub><br>(0.053)                 | 0.392 <sub>4</sub><br>(0.054)                 | <b>0.389</b> <sub>1</sub><br>( <b>0.051</b> ) | 0.389 <sub>2</sub><br>(0.051)                 |
| horse     | 0.644 <sub>5</sub><br>(0.007)                 | <b>0.434</b> <sub>1</sub><br>( <b>0.047</b> ) | 0.444 <sub>4</sub><br>(0.046)                 | 0.443 <sub>3</sub><br>(0.046)                 | 0.444 <sub>2</sub><br>(0.046)                 |
| ionosph   | 0.531 <sub>5</sub><br>(0.015)                 | 0.199 <sub>2</sub><br>(0.048)                 | <b>0.198</b> <sub>1</sub><br>( <b>0.046</b> ) | 0.199 <sub>4</sub><br>(0.046)                 | 0.199 <sub>3</sub><br>(0.046)                 |
| iris      | <b>0.000</b> <sub>1</sub><br>( <b>0.000</b> ) | 0.000 <sub>2,5</sub><br>(0.000)               | 0.000 <sub>2,5</sub><br>(0.000)               | 0.000 <sub>4</sub><br>(0.000)                 | 0.000 <sub>3</sub><br>(0.000)                 |
| landsat   | 0.608 <sub>5</sub><br>(0.006)                 | 0.038 <sub>2</sub><br>(0.008)                 | <b>0.037</b> <sub>1</sub><br>( <b>0.007</b> ) | 0.038 <sub>3</sub><br>(0.008)                 | 0.038 <sub>4</sub><br>(0.008)                 |
| letter    | 0.577 <sub>5</sub><br>(0.003)                 | 0.022 <sub>2</sub><br>(0.003)                 | <b>0.022</b> <sub>1</sub><br>( <b>0.003</b> ) | 0.022 <sub>3</sub><br>(0.003)                 | 0.022 <sub>4</sub><br>(0.003)                 |
| libras-   | 0.237 <sub>5</sub><br>(0.036)                 | <b>0.098</b> <sub>1</sub><br>( <b>0.064</b> ) | 0.103 <sub>3</sub><br>(0.054)                 | 0.111 <sub>4</sub><br>(0.063)                 | 0.099 <sub>2</sub><br>(0.053)                 |
| lung-ca   | 0.218 <sub>5</sub><br>(0.632)                 | 0.138 <sub>3</sub><br>(0.178)                 | 0.138 <sub>2</sub><br>(0.178)                 | <b>0.133</b> <sub>1</sub><br>( <b>0.146</b> ) | 0.140 <sub>4</sub><br>(0.187)                 |
| mfeat-k   | 0.460 <sub>5</sub><br>(0.020)                 | <b>0.029</b> <sub>1</sub><br>( <b>0.013</b> ) | 0.030 <sub>2</sub><br>(0.013)                 | 0.031 <sub>4</sub><br>(0.013)                 | 0.030 <sub>3</sub><br>(0.013)                 |
| mfeat-m   | 0.076 <sub>5</sub><br>(0.029)                 | 0.014 <sub>3</sub><br>(0.017)                 | <b>0.013</b> <sub>1</sub><br>( <b>0.015</b> ) | 0.014 <sub>2</sub><br>(0.016)                 | 0.015 <sub>4</sub><br>(0.016)                 |
| mfeat-z   | 0.351 <sub>5</sub><br>(0.029)                 | 0.032 <sub>2</sub><br>(0.014)                 | <b>0.032</b> <sub>1</sub><br>( <b>0.014</b> ) | 0.033 <sub>4</sub><br>(0.014)                 | 0.033 <sub>3</sub><br>(0.014)                 |
| mushroo   | 0.541 <sub>5</sub><br>(0.005)                 | 0.000 <sub>3</sub><br>(0.000)                 | 0.000 <sub>2</sub><br>(0.000)                 | 0.000 <sub>4</sub><br>(0.000)                 | <b>0.000</b> <sub>1</sub><br>( <b>0.000</b> ) |
| optdigi   | 0.577 <sub>5</sub><br>(0.010)                 | 0.034 <sub>2</sub><br>(0.007)                 | <b>0.034</b> <sub>1</sub><br>( <b>0.007</b> ) | 0.036 <sub>4</sub><br>(0.008)                 | 0.036 <sub>3</sub><br>(0.008)                 |
| page-bl   | 0.662 <sub>5</sub><br>(0.001)                 | 0.088 <sub>2</sub><br>(0.011)                 | <b>0.088</b> <sub>1</sub><br>( <b>0.011</b> ) | 0.093 <sub>4</sub><br>(0.013)                 | 0.093 <sub>3</sub><br>(0.013)                 |
| pendigi   | 0.474 <sub>5</sub><br>(0.010)                 | 0.014 <sub>2</sub><br>(0.004)                 | <b>0.014</b> <sub>1</sub><br>( <b>0.004</b> ) | 0.015 <sub>4</sub><br>(0.004)                 | 0.015 <sub>3</sub><br>(0.004)                 |
| scene-c   | 0.654 <sub>5</sub><br>(0.006)                 | <b>0.386</b> <sub>1</sub><br>( <b>0.012</b> ) | 0.389 <sub>2</sub><br>(0.013)                 | 0.394 <sub>4</sub><br>(0.012)                 | 0.394 <sub>3</sub><br>(0.011)                 |
| segment   | 0.241 <sub>5</sub><br>(0.025)                 | 0.009 <sub>4</sub><br>(0.008)                 | <b>0.009</b> <sub>1</sub><br>( <b>0.007</b> ) | 0.009 <sub>3</sub><br>(0.007)                 | 0.009 <sub>2</sub><br>(0.007)                 |
| shuttle   | 0.478 <sub>5</sub><br>(0.020)                 | 0.000 <sub>2</sub><br>(0.001)                 | <b>0.000</b> <sub>1</sub><br>( <b>0.001</b> ) | 0.000 <sub>3</sub><br>(0.001)                 | 0.000 <sub>4</sub><br>(0.001)                 |
| sonar     | 0.620 <sub>5</sub><br>(0.009)                 | 0.414 <sub>4</sub><br>(0.073)                 | <b>0.412</b> <sub>1</sub><br>( <b>0.071</b> ) | 0.413 <sub>3</sub><br>(0.071)                 | 0.413 <sub>2</sub><br>(0.071)                 |
| spambas   | 0.646 <sub>5</sub><br>(0.004)                 | <b>0.178</b> <sub>1</sub><br>( <b>0.013</b> ) | 0.178 <sub>2</sub><br>(0.013)                 | 0.182 <sub>4</sub><br>(0.014)                 | 0.182 <sub>3</sub><br>(0.014)                 |
| tic-tac   | 0.689 <sub>5</sub><br>(0.000)                 | 0.169 <sub>2</sub><br>(0.031)                 | 0.193 <sub>4</sub><br>(0.034)                 | <b>0.169</b> <sub>1</sub><br>( <b>0.031</b> ) | 0.170 <sub>3</sub><br>(0.030)                 |
| vehicle   | 0.575 <sub>5</sub><br>(0.009)                 | 0.070 <sub>2</sub><br>(0.021)                 | <b>0.070</b> <sub>1</sub><br>( <b>0.020</b> ) | 0.071 <sub>4</sub><br>(0.020)                 | 0.071 <sub>3</sub><br>(0.020)                 |
| vowel     | 0.422 <sub>5</sub><br>(0.011)                 | <b>0.064</b> <sub>1</sub><br>( <b>0.019</b> ) | 0.066 <sub>4</sub><br>(0.018)                 | 0.065 <sub>3</sub><br>(0.018)                 | 0.065 <sub>2</sub><br>(0.018)                 |
| wavefor   | 0.669 <sub>5</sub><br>(0.004)                 | 0.262 <sub>2</sub><br>(0.011)                 | <b>0.261</b> <sub>1</sub><br>( <b>0.012</b> ) | 0.266 <sub>4</sub><br>(0.012)                 | 0.266 <sub>3</sub><br>(0.012)                 |
| wdbc      | 0.422 <sub>5</sub><br>(0.027)                 | 0.090 <sub>2</sub><br>(0.033)                 | <b>0.089</b> <sub>1</sub><br>( <b>0.032</b> ) | 0.091 <sub>4</sub><br>(0.032)                 | 0.090 <sub>3</sub><br>(0.032)                 |
| wpbc      | 0.625 <sub>5</sub><br>(0.012)                 | 0.503 <sub>3</sub><br>(0.036)                 | 0.508 <sub>4</sub><br>(0.044)                 | 0.503 <sub>2</sub><br>(0.033)                 | <b>0.502</b> <sub>1</sub><br>( <b>0.033</b> ) |
| yeast     | 0.673 <sub>5</sub><br>(0.002)                 | <b>0.540</b> <sub>1</sub><br>( <b>0.012</b> ) | 0.548 <sub>4</sub><br>(0.015)                 | 0.541 <sub>2</sub><br>(0.011)                 | 0.541 <sub>3</sub><br>(0.011)                 |
| zoo       | <b>0.006</b> <sub>1</sub><br>( <b>0.013</b> ) | 0.013 <sub>3</sub><br>(0.020)                 | 0.013 <sub>4</sub><br>(0.020)                 | 0.013 <sub>2</sub><br>(0.020)                 | 0.013 <sub>5</sub><br>(0.020)                 |
| rank      | 4.76                                          | 1.96                                          | 2.06                                          | 3.24                                          | 2.98                                          |

Table 18: Brier score results for Ada-S (standard deviation in parentheses). Best results are marked in **bold** and subscript numbers indicate the ranks. Differences between results may occur after the third decimal digit. Results significant at  $1.576e-13$ , according to Friedman’s test.

| dataset   | uncalibrated                                  | beta                                          | beta05                                        | beta2                                         | logistic                                      |
|-----------|-----------------------------------------------|-----------------------------------------------|-----------------------------------------------|-----------------------------------------------|-----------------------------------------------|
| abalone   | 0.249 <sub>5</sub><br>(0.000)                 | 0.220 <sub>2</sub><br>(0.003)                 | <b>0.220</b> <sub>1</sub><br>( <b>0.004</b> ) | 0.222 <sub>3</sub><br>(0.003)                 | 0.222 <sub>4</sub><br>(0.003)                 |
| autos     | 0.165 <sub>5</sub><br>(0.010)                 | 0.074 <sub>2</sub><br>(0.025)                 | <b>0.073</b> <sub>1</sub><br>( <b>0.024</b> ) | 0.077 <sub>4</sub><br>(0.022)                 | 0.076 <sub>3</sub><br>(0.022)                 |
| balance   | 0.225 <sub>5</sub><br>(0.001)                 | 0.009 <sub>2</sub><br>(0.006)                 | 0.009 <sub>4</sub><br>(0.006)                 | <b>0.009</b> <sub>1</sub><br>( <b>0.006</b> ) | 0.009 <sub>3</sub><br>(0.006)                 |
| car       | 0.229 <sub>5</sub><br>(0.001)                 | 0.033 <sub>3</sub><br>(0.006)                 | 0.034 <sub>4</sub><br>(0.006)                 | 0.033 <sub>2</sub><br>(0.006)                 | <b>0.033</b> <sub>1</sub><br>( <b>0.006</b> ) |
| cleveland | 0.238 <sub>5</sub><br>(0.002)                 | 0.155 <sub>2</sub><br>(0.018)                 | <b>0.155</b> <sub>1</sub><br>( <b>0.018</b> ) | 0.156 <sub>4</sub><br>(0.017)                 | 0.156 <sub>3</sub><br>(0.017)                 |
| credit    | 0.241 <sub>5</sub><br>(0.001)                 | 0.121 <sub>2</sub><br>(0.013)                 | <b>0.121</b> <sub>1</sub><br>( <b>0.012</b> ) | 0.124 <sub>4</sub><br>(0.013)                 | 0.124 <sub>3</sub><br>(0.013)                 |
| dermato   | <b>0.006</b> <sub>1</sub><br>( <b>0.009</b> ) | 0.006 <sub>4</sub><br>(0.009)                 | 0.006 <sub>2</sub><br>(0.009)                 | 0.007 <sub>3</sub><br>(0.009)                 | 0.006 <sub>5</sub><br>(0.009)                 |
| diabete   | 0.245 <sub>5</sub><br>(0.001)                 | <b>0.178</b> <sub>1</sub><br>( <b>0.007</b> ) | 0.179 <sub>2</sub><br>(0.009)                 | 0.184 <sub>4</sub><br>(0.007)                 | 0.184 <sub>3</sub><br>(0.007)                 |
| ecoli     | 0.125 <sub>5</sub><br>(0.021)                 | 0.037 <sub>4</sub><br>(0.019)                 | 0.037 <sub>2</sub><br>(0.019)                 | 0.037 <sub>3</sub><br>(0.019)                 | <b>0.037</b> <sub>1</sub><br>( <b>0.019</b> ) |
| flare     | 0.227 <sub>5</sub><br>(0.006)                 | <b>0.133</b> <sub>1</sub><br>( <b>0.008</b> ) | 0.139 <sub>4</sub><br>(0.010)                 | 0.133 <sub>2</sub><br>(0.008)                 | 0.133 <sub>3</sub><br>(0.008)                 |
| german    | 0.248 <sub>5</sub><br>(0.000)                 | <b>0.184</b> <sub>1</sub><br>( <b>0.007</b> ) | 0.186 <sub>2</sub><br>(0.009)                 | 0.190 <sub>3</sub><br>(0.006)                 | 0.190 <sub>4</sub><br>(0.006)                 |
| glass     | 0.233 <sub>5</sub><br>(0.003)                 | <b>0.162</b> <sub>1</sub><br>( <b>0.019</b> ) | 0.162 <sub>2</sub><br>(0.019)                 | 0.167 <sub>4</sub><br>(0.017)                 | 0.167 <sub>3</sub><br>(0.017)                 |
| heart-s   | 0.236 <sub>5</sub><br>(0.002)                 | <b>0.154</b> <sub>1</sub><br>( <b>0.020</b> ) | 0.155 <sub>2</sub><br>(0.020)                 | 0.155 <sub>4</sub><br>(0.019)                 | 0.155 <sub>3</sub><br>(0.019)                 |
| hepatit   | 0.186 <sub>5</sub><br>(0.012)                 | 0.124 <sub>3</sub><br>(0.020)                 | 0.125 <sub>4</sub><br>(0.021)                 | 0.123 <sub>2</sub><br>(0.020)                 | <b>0.123</b> <sub>1</sub><br>( <b>0.020</b> ) |
| horse     | 0.226 <sub>5</sub><br>(0.003)                 | <b>0.133</b> <sub>1</sub><br>( <b>0.019</b> ) | 0.137 <sub>4</sub><br>(0.018)                 | 0.136 <sub>2</sub><br>(0.018)                 | 0.136 <sub>3</sub><br>(0.018)                 |
| ionosph   | 0.171 <sub>5</sub><br>(0.007)                 | 0.054 <sub>2</sub><br>(0.015)                 | <b>0.054</b> <sub>1</sub><br>( <b>0.016</b> ) | 0.054 <sub>4</sub><br>(0.015)                 | 0.054 <sub>3</sub><br>(0.015)                 |
| iris      | <b>0.000</b> <sub>1</sub><br>( <b>0.000</b> ) | 0.000 <sub>3</sub><br>(0.000)                 | 0.000 <sub>2</sub><br>(0.000)                 | 0.000 <sub>4</sub><br>(0.000)                 | 0.000 <sub>5</sub><br>(0.000)                 |
| landsat   | 0.208 <sub>5</sub><br>(0.003)                 | 0.010 <sub>3</sub><br>(0.002)                 | <b>0.010</b> <sub>1</sub><br>( <b>0.002</b> ) | 0.010 <sub>2</sub><br>(0.002)                 | 0.010 <sub>4</sub><br>(0.002)                 |
| letter    | 0.193 <sub>5</sub><br>(0.001)                 | 0.006 <sub>2</sub><br>(0.001)                 | <b>0.006</b> <sub>1</sub><br>( <b>0.001</b> ) | 0.006 <sub>3</sub><br>(0.001)                 | 0.006 <sub>4</sub><br>(0.001)                 |
| libras-   | 0.052 <sub>5</sub><br>(0.010)                 | <b>0.021</b> <sub>1</sub><br>( <b>0.013</b> ) | 0.024 <sub>4</sub><br>(0.012)                 | 0.023 <sub>2</sub><br>(0.012)                 | 0.021 <sub>3</sub><br>(0.012)                 |
| lung-ca   | 0.027 <sub>1</sub><br>(0.024)                 | 0.032 <sub>4</sub><br>(0.022)                 | 0.032 <sub>2</sub><br>(0.022)                 | 0.032 <sub>3</sub><br>(0.022)                 | 0.032 <sub>5</sub><br>(0.022)                 |
| mfeat-k   | 0.137 <sub>5</sub><br>(0.009)                 | <b>0.006</b> <sub>1</sub><br>( <b>0.003</b> ) | 0.006 <sub>4</sub><br>(0.003)                 | 0.006 <sub>2</sub><br>(0.003)                 | 0.006 <sub>3</sub><br>(0.003)                 |
| mfeat-m   | 0.009 <sub>5</sub><br>(0.004)                 | 0.002 <sub>3</sub><br>(0.002)                 | <b>0.002</b> <sub>1</sub><br>( <b>0.002</b> ) | 0.002 <sub>2</sub><br>(0.002)                 | 0.002 <sub>4</sub><br>(0.002)                 |
| mfeat-z   | 0.091 <sub>5</sub><br>(0.011)                 | <b>0.007</b> <sub>1</sub><br>( <b>0.003</b> ) | 0.007 <sub>2</sub><br>(0.003)                 | 0.007 <sub>4</sub><br>(0.003)                 | 0.007 <sub>3</sub><br>(0.003)                 |
| mushroo   | 0.175 <sub>5</sub><br>(0.002)                 | 0.000 <sub>3</sub><br>(0.000)                 | <b>0.000</b> <sub>1</sub><br>( <b>0.000</b> ) | 0.000 <sub>2</sub><br>(0.000)                 | 0.000 <sub>4</sub><br>(0.000)                 |
| optdigi   | 0.192 <sub>5</sub><br>(0.005)                 | 0.008 <sub>2</sub><br>(0.002)                 | <b>0.008</b> <sub>1</sub><br>( <b>0.002</b> ) | 0.008 <sub>4</sub><br>(0.002)                 | 0.008 <sub>3</sub><br>(0.002)                 |
| page-bl   | 0.235 <sub>5</sub><br>(0.001)                 | 0.024 <sub>2</sub><br>(0.003)                 | <b>0.024</b> <sub>1</sub><br>( <b>0.003</b> ) | 0.025 <sub>4</sub><br>(0.003)                 | 0.025 <sub>3</sub><br>(0.003)                 |
| pendigi   | 0.145 <sub>5</sub><br>(0.005)                 | 0.003 <sub>2</sub><br>(0.001)                 | <b>0.003</b> <sub>1</sub><br>( <b>0.001</b> ) | 0.003 <sub>4</sub><br>(0.001)                 | 0.003 <sub>3</sub><br>(0.001)                 |
| scene-c   | 0.231 <sub>5</sub><br>(0.003)                 | <b>0.123</b> <sub>1</sub><br>( <b>0.005</b> ) | 0.123 <sub>2</sub><br>(0.005)                 | 0.126 <sub>4</sub><br>(0.004)                 | 0.126 <sub>3</sub><br>(0.004)                 |
| segment   | 0.050 <sub>5</sub><br>(0.008)                 | 0.002 <sub>4</sub><br>(0.001)                 | <b>0.002</b> <sub>1</sub><br>( <b>0.002</b> ) | 0.002 <sub>2</sub><br>(0.001)                 | 0.002 <sub>3</sub><br>(0.001)                 |
| shuttle   | 0.146 <sub>5</sub><br>(0.009)                 | <b>0.000</b> <sub>1</sub><br>( <b>0.000</b> ) | 0.000 <sub>4</sub><br>(0.000)                 | 0.000 <sub>2</sub><br>(0.000)                 | 0.000 <sub>3</sub><br>(0.000)                 |
| sonar     | 0.214 <sub>5</sub><br>(0.004)                 | 0.131 <sub>2</sub><br>(0.029)                 | <b>0.130</b> <sub>1</sub><br>( <b>0.029</b> ) | 0.131 <sub>4</sub><br>(0.029)                 | 0.131 <sub>3</sub><br>(0.029)                 |
| spambas   | 0.227 <sub>5</sub><br>(0.002)                 | <b>0.047</b> <sub>1</sub><br>( <b>0.003</b> ) | 0.047 <sub>2</sub><br>(0.003)                 | 0.047 <sub>4</sub><br>(0.003)                 | 0.047 <sub>3</sub><br>(0.003)                 |
| tic-tac   | 0.248 <sub>5</sub><br>(0.000)                 | 0.045 <sub>2</sub><br>(0.009)                 | 0.056 <sub>4</sub><br>(0.011)                 | <b>0.045</b> <sub>1</sub><br>( <b>0.009</b> ) | 0.045 <sub>3</sub><br>(0.009)                 |
| vehicle   | 0.192 <sub>5</sub><br>(0.004)                 | <b>0.018</b> <sub>1</sub><br>( <b>0.005</b> ) | 0.018 <sub>2</sub><br>(0.005)                 | 0.018 <sub>4</sub><br>(0.005)                 | 0.018 <sub>3</sub><br>(0.005)                 |
| vowel     | 0.123 <sub>5</sub><br>(0.004)                 | <b>0.017</b> <sub>1</sub><br>( <b>0.006</b> ) | 0.018 <sub>4</sub><br>(0.005)                 | 0.017 <sub>2</sub><br>(0.005)                 | 0.017 <sub>3</sub><br>(0.005)                 |
| wavefor   | 0.238 <sub>5</sub><br>(0.002)                 | 0.080 <sub>2</sub><br>(0.004)                 | <b>0.080</b> <sub>1</sub><br>( <b>0.004</b> ) | 0.081 <sub>4</sub><br>(0.004)                 | 0.081 <sub>3</sub><br>(0.004)                 |
| wdbc      | 0.121 <sub>5</sub><br>(0.011)                 | 0.024 <sub>2</sub><br>(0.010)                 | <b>0.024</b> <sub>1</sub><br>( <b>0.009</b> ) | 0.024 <sub>4</sub><br>(0.009)                 | 0.024 <sub>3</sub><br>(0.009)                 |
| wpbc      | 0.216 <sub>5</sub><br>(0.006)                 | 0.164 <sub>3</sub><br>(0.013)                 | 0.166 <sub>4</sub><br>(0.017)                 | 0.164 <sub>2</sub><br>(0.012)                 | <b>0.164</b> <sub>1</sub><br>( <b>0.012</b> ) |
| yeast     | 0.240 <sub>5</sub><br>(0.001)                 | <b>0.185</b> <sub>1</sub><br>( <b>0.004</b> ) | 0.189 <sub>4</sub><br>(0.005)                 | 0.186 <sub>2</sub><br>(0.                     |                                               |

Table 19: Accuracy results for Ada-S in % (standard deviation in parentheses). Best results are marked in **bold** and subscript numbers indicate the ranks. Differences between results may occur after the third decimal digit. Results not significant, according to Friedman’s test (p-value = 0.162).

| dataset   | uncalibrated                          | beta                                  | beta[m = 1/2]                         | beta[a=b]                             | logistic                              |
|-----------|---------------------------------------|---------------------------------------|---------------------------------------|---------------------------------------|---------------------------------------|
| abalone   | 63.304 <sub>4</sub><br>(1.430)        | <b>63.778</b> <sub>1</sub><br>(0.329) | 63.091 <sub>5</sub><br>(1.404)        | 63.696 <sub>2</sub><br>(0.313)        | 63.696 <sub>3</sub><br>(0.308)        |
| autos     | 91.495 <sub>5</sub><br>(4.969)        | 91.609 <sub>2</sub><br>(4.483)        | 91.550 <sub>4</sub><br>(4.474)        | 91.555 <sub>3</sub><br>(4.593)        | <b>91.674</b> <sub>1</sub><br>(4.618) |
| balance   | 98.830 <sub>5</sub><br>(1.015)        | 98.975 <sub>2</sub><br>(1.097)        | 98.895 <sub>4</sub><br>(0.927)        | 98.959 <sub>3</sub><br>(1.135)        | <b>99.023</b> <sub>1</sub><br>(1.064) |
| car       | 95.034 <sub>5</sub><br>(1.059)        | 95.156 <sub>2,5</sub><br>(1.101)      | 95.052 <sub>4</sub><br>(1.081)        | 95.156 <sub>2,5</sub><br>(1.101)      | <b>95.156</b> <sub>1</sub><br>(1.111) |
| cleveland | <b>79.483</b> <sub>1</sub><br>(4.701) | 78.227 <sub>5</sub><br>(5.020)        | 78.772 <sub>2</sub><br>(4.725)        | 78.363 <sub>3,5</sub><br>(5.046)      | 78.363 <sub>3,5</sub><br>(5.046)      |
| credit-   | 84.258 <sub>2</sub><br>(2.464)        | 83.968 <sub>3</sub><br>(2.696)        | <b>84.396</b> <sub>1</sub><br>(2.350) | 83.877 <sub>4,5</sub><br>(2.735)      | 83.877 <sub>4,5</sub><br>(2.735)      |
| dermato   | 99.408 <sub>2,5</sub><br>(1.111)      | 99.408 <sub>2,5</sub><br>(1.111)      | 99.408 <sub>2,5</sub><br>(1.111)      | 99.351 <sub>5</sub><br>(1.153)        | 99.408 <sub>2,5</sub><br>(1.111)      |
| diabete   | 74.115 <sub>2</sub><br>(2.873)        | 73.591 <sub>3</sub><br>(2.166)        | <b>74.245</b> <sub>1</sub><br>(3.130) | 72.096 <sub>4</sub><br>(2.632)        | 72.070 <sub>5</sub><br>(2.658)        |
| ecoli     | <b>96.808</b> <sub>1</sub><br>(2.450) | 95.725 <sub>5</sub><br>(2.574)        | 95.729 <sub>4</sub><br>(2.572)        | 95.754 <sub>3</sub><br>(2.566)        | 95.783 <sub>2</sub><br>(2.523)        |
| flare     | 82.145 <sub>4</sub><br>(1.267)        | 82.260 <sub>2</sub><br>(1.135)        | 82.145 <sub>5</sub><br>(1.251)        | 82.260 <sub>2</sub><br>(1.135)        | 82.260 <sub>2</sub><br>(1.135)        |
| german    | 73.810 <sub>2</sub><br>(2.470)        | 71.530 <sub>3</sub><br>(2.088)        | <b>73.860</b> <sub>1</sub><br>(2.458) | 70.600 <sub>4</sub><br>(1.161)        | 70.560 <sub>5</sub><br>(1.155)        |
| glass     | <b>80.460</b> <sub>1</sub><br>(4.919) | 79.168 <sub>3</sub><br>(5.608)        | 79.978 <sub>2</sub><br>(4.808)        | 78.421 <sub>5</sub><br>(4.343)        | 78.516 <sub>4</sub><br>(4.386)        |
| heart-s   | <b>79.074</b> <sub>1</sub><br>(5.347) | 78.222 <sub>5</sub><br>(5.083)        | 78.593 <sub>2</sub><br>(5.526)        | 78.333 <sub>3,5</sub><br>(5.360)      | 78.333 <sub>3,5</sub><br>(5.360)      |
| hepatit   | <b>82.916</b> <sub>1</sub><br>(6.088) | 80.733 <sub>5</sub><br>(4.211)        | 81.698 <sub>3</sub><br>(5.907)        | 81.826 <sub>2</sub><br>(4.429)        | 81.697 <sub>4</sub><br>(4.561)        |
| horse     | <b>83.870</b> <sub>1</sub><br>(4.325) | 83.038 <sub>5</sub><br>(3.929)        | 83.672 <sub>2</sub><br>(4.381)        | 83.339 <sub>4</sub><br>(3.827)        | 83.373 <sub>3</sub><br>(3.849)        |
| ionosph   | <b>93.336</b> <sub>1</sub><br>(2.652) | 93.223 <sub>5</sub><br>(2.511)        | 93.252 <sub>4</sub><br>(2.543)        | 93.336 <sub>2,5</sub><br>(2.392)      | 93.336 <sub>2,5</sub><br>(2.392)      |
| iris      | 100.000 <sub>3</sub><br>(0.000)       |
| landsat   | 98.636 <sub>5</sub><br>(0.343)        | 98.645 <sub>4</sub><br>(0.336)        | <b>98.656</b> <sub>1</sub><br>(0.343) | 98.650 <sub>3</sub><br>(0.348)        | 98.651 <sub>2</sub><br>(0.347)        |
| letter    | 99.202 <sub>2</sub><br>(0.099)        | 99.200 <sub>3</sub><br>(0.102)        | <b>99.207</b> <sub>1</sub><br>(0.097) | 99.200 <sub>4</sub><br>(0.101)        | 99.198 <sub>5</sub><br>(0.102)        |
| libras-   | 97.080 <sub>5</sub><br>(1.580)        | <b>97.693</b> <sub>1</sub><br>(1.809) | 97.307 <sub>4</sub><br>(1.620)        | 97.553 <sub>3</sub><br>(1.759)        | 97.640 <sub>2</sub><br>(1.811)        |
| lung-ca   | <b>97.295</b> <sub>1</sub><br>(3.820) | 95.621 <sub>4</sub><br>(4.386)        | 95.726 <sub>2,5</sub><br>(4.297)      | 95.726 <sub>2,5</sub><br>(4.297)      | 95.521 <sub>5</sub><br>(4.457)        |
| mfeat-k   | <b>99.330</b> <sub>1</sub><br>(0.393) | 99.325 <sub>2</sub><br>(0.347)        | 99.315 <sub>3</sub><br>(0.353)        | 99.315 <sub>4,5</sub><br>(0.349)      | 99.315 <sub>4,5</sub><br>(0.349)      |
| mfeat-m   | 99.765 <sub>5</sub><br>(0.211)        | 99.775 <sub>2</sub><br>(0.216)        | <b>99.775</b> <sub>1</sub><br>(0.210) | 99.770 <sub>3,5</sub><br>(0.213)      | 99.770 <sub>3,5</sub><br>(0.213)      |
| mfeat-z   | 99.155 <sub>5</sub><br>(0.413)        | 99.185 <sub>3</sub><br>(0.413)        | 99.170 <sub>4</sub><br>(0.409)        | 99.190 <sub>2</sub><br>(0.403)        | <b>99.195</b> <sub>1</sub><br>(0.402) |
| mushroo   | 100.000 <sub>3</sub><br>(0.000)       |
| optdigi   | 98.899 <sub>5</sub><br>(0.289)        | <b>98.925</b> <sub>1</sub><br>(0.281) | 98.925 <sub>2</sub><br>(0.280)        | 98.918 <sub>3,5</sub><br>(0.289)      | 98.918 <sub>3,5</sub><br>(0.289)      |
| page-bl   | <b>96.996</b> <sub>1</sub><br>(0.461) | 96.938 <sub>3</sub><br>(0.426)        | 96.962 <sub>2</sub><br>(0.481)        | 96.865 <sub>5</sub><br>(0.468)        | 96.867 <sub>4</sub><br>(0.470)        |
| pendigi   | 99.674 <sub>2</sub><br>(0.115)        | 99.671 <sub>3</sub><br>(0.118)        | <b>99.685</b> <sub>1</sub><br>(0.108) | 99.662 <sub>4</sub><br>(0.121)        | 99.660 <sub>5</sub><br>(0.122)        |
| scene-c   | <b>83.224</b> <sub>1</sub><br>(1.450) | 82.526 <sub>3</sub><br>(1.168)        | 83.120 <sub>2</sub><br>(1.592)        | 81.508 <sub>4</sub><br>(1.108)        | 81.495 <sub>5</sub><br>(1.105)        |
| segment   | 99.732 <sub>5</sub><br>(0.250)        | 99.740 <sub>4</sub><br>(0.219)        | <b>99.779</b> <sub>1</sub><br>(0.207) | 99.758 <sub>2</sub><br>(0.199)        | 99.753 <sub>3</sub><br>(0.205)        |
| shuttle   | 99.995 <sub>5</sub><br>(0.006)        | 99.998 <sub>3</sub><br>(0.005)        | <b>99.998</b> <sub>1</sub><br>(0.005) | 99.998 <sub>4</sub><br>(0.005)        | 99.998 <sub>2</sub><br>(0.005)        |
| sonar     | 81.865 <sub>5</sub><br>(6.839)        | 81.893 <sub>2</sub><br>(6.172)        | <b>82.096</b> <sub>1</sub><br>(6.162) | 81.802 <sub>5</sub><br>(6.497)        | 81.851 <sub>4</sub><br>(6.459)        |
| spambas   | 94.256 <sub>5</sub><br>(0.637)        | <b>94.523</b> <sub>1</sub><br>(0.618) | 94.508 <sub>4</sub><br>(0.560)        | 94.508 <sub>2,5</sub><br>(0.573)      | 94.508 <sub>2,5</sub><br>(0.573)      |
| tic-tac   | 91.618 <sub>5</sub><br>(2.118)        | 95.189 <sub>2</sub><br>(1.469)        | 91.702 <sub>4</sub><br>(2.042)        | <b>95.199</b> <sub>1</sub><br>(1.479) | 95.178 <sub>3</sub><br>(1.458)        |
| vehicle   | 97.766 <sub>5</sub><br>(0.941)        | 97.849 <sub>4</sub><br>(1.009)        | <b>97.883</b> <sub>1</sub><br>(0.979) | 97.861 <sub>2,5</sub><br>(0.967)      | 97.861 <sub>2,5</sub><br>(0.967)      |
| vowel     | 97.455 <sub>5</sub><br>(0.866)        | <b>97.960</b> <sub>1</sub><br>(1.030) | 97.687 <sub>4</sub><br>(0.896)        | 97.889 <sub>3</sub><br>(0.972)        | 97.909 <sub>2</sub><br>(0.973)        |
| wavefor   | 88.830 <sub>5</sub><br>(0.788)        | 88.986 <sub>3</sub><br>(0.773)        | 88.962 <sub>4</sub><br>(0.774)        | <b>88.996</b> <sub>1</sub><br>(0.820) | 88.996 <sub>2</sub><br>(0.827)        |
| wdbc      | <b>97.082</b> <sub>1</sub><br>(1.437) | 97.011 <sub>3</sub><br>(1.668)        | 97.012 <sub>2</sub><br>(1.712)        | 96.940 <sub>5</sub><br>(1.643)        | 96.958 <sub>4</sub><br>(1.643)        |
| wpbc      | 77.806 <sub>2</sub><br>(4.605)        | 76.605 <sub>3</sub><br>(2.390)        | <b>78.416</b> <sub>1</sub><br>(4.369) | 76.457 <sub>4,5</sub><br>(2.117)      | 76.457 <sub>4,5</sub><br>(2.117)      |
| yeast     | 72.639 <sub>2</sub><br>(2.076)        | 69.177 <sub>5</sub><br>(0.654)        | <b>72.896</b> <sub>1</sub><br>(2.101) | 69.264 <sub>3</sub><br>(0.810)        | 69.251 <sub>4</sub><br>(0.814)        |
| zoo       | 100.000 <sub>3</sub><br>(0.000)       |
| rank      | 3.01                                  | 3.00                                  | 2.51                                  | 3.29                                  | 3.18                                  |

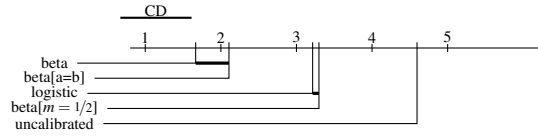

Figure 5: Critical difference diagram for Brier scores results of parametric methods with Naive Bayes as base classifier. Friedman test shows significance at p-value=2.368e−18.

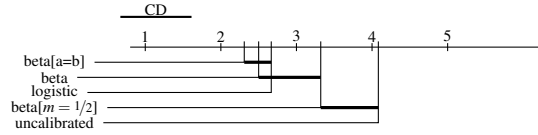

Figure 6: Critical difference diagram for accuracy results of parametric methods with Naive Bayes as base classifier. Friedman test shows significance at p-value=3.844e−08.

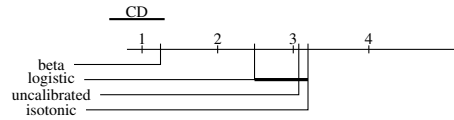

Figure 7: Critical difference diagram for log-loss results with Ada-O as base classifier. Friedman test shows significance at p-value=1.008e−12.

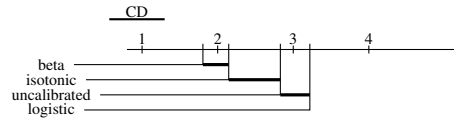

Figure 8: Critical difference diagram for Brier score results with Ada-O as base classifier. Friedman test shows significance at p-value=3.745e−06.

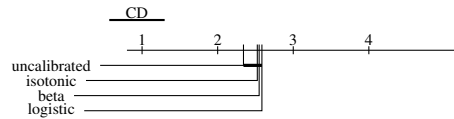

Figure 9: Critical difference diagram for accuracy results with Ada-O as base classifier. Results not significant, according to Friedman’s test (p-value = 0.813).

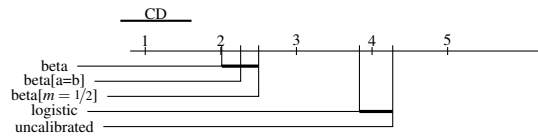

Figure 10: Critical difference diagram for log-loss results of parametric methods with Ada-O as base classifier. Friedman test shows significance at p-value=1.598e−15.

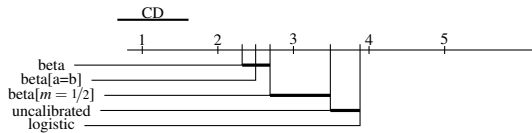

Figure 11: Critical difference diagram for Brier score results of parametric methods with Ada-O as base classifier. Friedman test shows significance at  $p\text{-value}=1.400e-06$ .

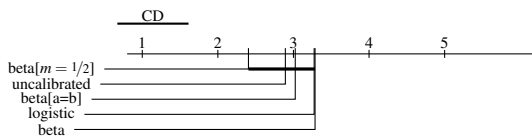

Figure 12: Critical difference diagram for Brier score results of parametric methods with Ada-O as base classifier. Results not significant, according to Friedman's test ( $p\text{-value} = 0.048$ ).

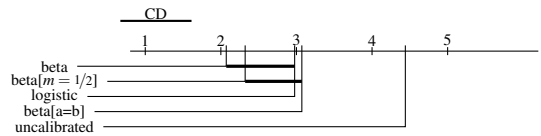

Figure 17: Critical difference diagram for Brier score results of parametric methods with Ada-S as base classifier. Friedman test shows significance at  $p\text{-value}=1.576e-13$ .

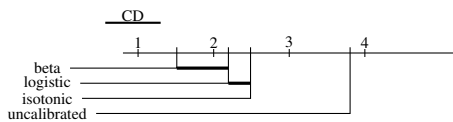

Figure 13: Critical difference diagram for log-loss results with Ada-S as base classifier. Friedman test shows significance at  $p\text{-value}=4.733e-15$ .

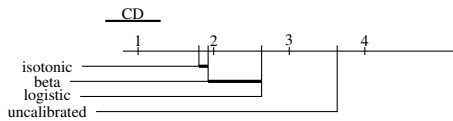

Figure 14: Critical difference diagram for Brier score results with Ada-S as base classifier. Friedman test shows significance at  $p\text{-value}=5.836e-13$ .

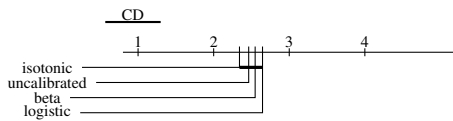

Figure 15: Critical difference diagram for accuracy results with Ada-S as base classifier. Results not significant, according to Friedman's test ( $p\text{-value} = 0.660$ ).

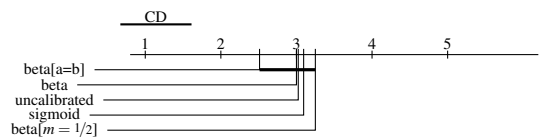

Figure 18: Critical difference diagram for accuracy results of parametric methods with Ada-S as base classifier. Results not significant, according to Friedman's test ( $p\text{-value} = 0.162$ ).

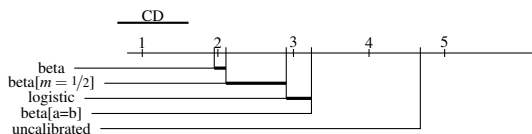

Figure 16: Critical difference diagram for log-loss results of parametric methods with Ada-S as base classifier. Friedman test shows significance at  $p\text{-value}=2.799e-17$ .

## References

- J. Friedman, T. Hastie, R. Tibshirani, et al. Additive logistic regression: a statistical view of boosting (with discussion and a rejoinder by the authors). *The Annals of Statistics*, 28(2):337–407, 2000.
- F. Pedregosa, G. Varoquaux, A. Gramfort, V. Michel, B. Thirion, O. Grisel, M. Blondel, P. Prettenhofer, R. Weiss, V. Dubourg, J. Vanderplas, A. Passos, D. Cournapeau, M. Brucher, M. Perrot, and E. Duchesnay. Scikit-learn: Machine learning in Python. *J. Machine Learning Research*, 12:2825–2830, 2011.
- J. Platt. Probabilities for SV machines. In A. Smola, P. Bartlett, B. Schölkopf, and D. Schuurmans, editors, *Adv. Large Margin Classifiers*, pages 61–74. MIT Press, 2000.
- J. Zhu, H. Zou, S. Rosset, and T. Hastie. Multi-class AdaBoost. *Statistics and its Interface*, 2(3):349–360, 2009.
